# Supplementary material
Source: PubMed Central journal article supplement (PMC9388555)

# SUPPLEMENTAL MATERIAL

|                                                         |          |
|---------------------------------------------------------|----------|
| <b>Supplemental Methods</b> .....                       | <b>3</b> |
| <i>Cohort recruitment</i> .....                         | 3        |
| <i>Clinical cohort characteristics assessment</i> ..... | 4        |
| <i>DNA extraction, sequencing, and processing</i> ..... | 4        |
| <i>Tier 1 and Tier 2 gene screen</i> .....              | 4        |
| <i>ACMG rare variant analysis</i> .....                 | 5        |
| <i>Splice variant analysis</i> .....                    | 5        |
| <i>Structural variant analysis</i> .....                | 5        |

|                                                                                                                                                                                                                       |           |
|-----------------------------------------------------------------------------------------------------------------------------------------------------------------------------------------------------------------------|-----------|
| <i>Clinical comparisons between rare gene list variant carriers and non-carriers</i> .....                                                                                                                            | 6         |
| <i>Rare variant collapsing analysis</i> .....                                                                                                                                                                         | 6         |
| <i>Novel loss-of-function (LoF) variants</i> .....                                                                                                                                                                    | 7         |
| <i>Validation of genes containing novel loss-of-function variants</i> .....                                                                                                                                           | 7         |
| <i>Pathway analysis of LoF intolerant genes with novel LoF variants</i> .....                                                                                                                                         | 8         |
| <i>Genes containing multiple rare structural variants</i> .....                                                                                                                                                       | 8         |
| <i>Short Tandem Repeats (STRs) analysis</i> .....                                                                                                                                                                     | 8         |
| <i>SCAD Polygenic Risk Scores (PRS)</i> .....                                                                                                                                                                         | 8         |
| <b>Supplemental Tables</b> .....                                                                                                                                                                                      | <b>9</b>  |
| <b><i>Supplementary Table I. Gene list sources</i></b> .....                                                                                                                                                          | <b>9</b>  |
| <b><i>Supplementary Table II. Gene list</i></b> .....                                                                                                                                                                 | <b>10</b> |
| <b><i>Supplementary Table III. Phenotypic features sought for connective tissue disorders</i></b> .....                                                                                                               | <b>14</b> |
| <b><i>Supplementary Table IV. Variants identified by ACMG (Tier 1 and 2) and splice variant (Tier 1 only) analysis in genes typically causing autosomal recessive disease where cases were heterozygous</i></b> ..... | <b>17</b> |
| <b><i>Supplementary Table V. Phenotypic data and history for cases with (likely) pathogenic or splice-altering variants in genes causative for a CTD</i></b> .....                                                    | <b>18</b> |
| <b><i>Supplementary Table VI. VUS only Carriers</i></b> .....                                                                                                                                                         | <b>21</b> |
| <b><i>Supplementary Table VII. Splice variants with lower SpliceAI scores (&lt;0.4) but ultra rare (&lt;0.001) in gnomAD</i></b> .....                                                                                | <b>24</b> |
| <b><i>Supplementary Table VIII. Samples and genes carrying qualifying variants within our CTD gene list</i></b> .....                                                                                                 | <b>25</b> |
| <b><i>Supplementary Table IX. Nominally significant genes identified by genome-wide collapsing analysis</i></b> .....                                                                                                 | <b>29</b> |
| <b><i>Supplementary Table X. Novel variants predicted to cause LoF in genes intolerant to LoF</i></b> .....                                                                                                           | <b>45</b> |
| <b><i>Supplementary Table XI. SVs in LoF-intolerant Genes</i></b> .....                                                                                                                                               | <b>47</b> |
| <b><i>Supplementary Table XII: SNPs comprising SCAD PGS calculations</i></b> .....                                                                                                                                    | <b>49</b> |
| <b><i>Supplementary Table XIII: COL4A4 variants identified in 91 SCAD cases</i></b> .....                                                                                                                             | <b>50</b> |

|                                                                                                                                                                                                                                                                                                                                                                                                                                                                                                                                                                                                                                                                                                                                                                            |    |
|----------------------------------------------------------------------------------------------------------------------------------------------------------------------------------------------------------------------------------------------------------------------------------------------------------------------------------------------------------------------------------------------------------------------------------------------------------------------------------------------------------------------------------------------------------------------------------------------------------------------------------------------------------------------------------------------------------------------------------------------------------------------------|----|
| <b>Supplementary Table XIV:</b> Collapsing analysis in cases and controls for the previously reported genes, <i>TSR1</i> , <i>TLN1</i> , and <i>F11R</i> .....                                                                                                                                                                                                                                                                                                                                                                                                                                                                                                                                                                                                             | 51 |
| <b>Supplementary Table XV:</b> Definitions of ACMG criteria contributing to likely pathogenic or pathogenic classification for candidate gene variants, taken from Richards et al. 2015 <sup>16</sup> .....                                                                                                                                                                                                                                                                                                                                                                                                                                                                                                                                                                | 51 |
| <b>Supplemental Figures and Figure Legends</b> .....                                                                                                                                                                                                                                                                                                                                                                                                                                                                                                                                                                                                                                                                                                                       | 52 |
| <b>Supplementary Figure I.</b> Polygenic risk score percentile amongst SCAD and DCM patients relative to MGRB control samples. Control scores were used to create a reference distribution of scores, created from the 5 SNPs identified in a SCAD GWAS by Turley et al 2020. <sup>74</sup> Violin plots indicate the percentile score distribution relative to the control distribution, while boxplots indicate the score quartiles. The median score for the SCAD group fell into the 73 <sup>rd</sup> percentile of the control population ( $p$ -value = $2.052e-10$ ), while the DCM median score was in the 55 <sup>th</sup> control percentile ( $p$ -value = $1.067e-06$ ). No difference was found between control and DCM scores ( $p$ -value = $0.9703$ )..... | 52 |

## **Supplemental Methods**

### *Cohort recruitment*

SCAD cases were recruited via a social media platform or through direct referral from cardiologists. Informed, written consent was obtained prior to enrolment into the study. The study was approved by the St. Vincent’s Hospital Human Research Ethics Committee (HREC/16/SVH/338, protocol number SVH 16/245) and conducted in accordance with the Australian National Health and Medical Research Council’s National Statement on Ethical Conduct in Human Research and the CPMP/ICH Note for Guidance on Good Clinical Practice. SCAD diagnosis was confirmed by review of coronary angiogram images by an expert interventional cardiologist (DM) blinded to the results of the genetic analysis. Patient information was obtained by phone interviews, review of specialist letters and hospital records. The cohort of 91 cases had no known family history of SCAD. A subset of the Medical Genome Reference Bank (MGRB)<sup>41</sup> with European ancestry, consisting of 1127 Australians over 70 years of age, free from cardiovascular disease, degenerative neurological disorders, and a history of cancer, was used as a control cohort for whole genome sequencing (WGS) data. A cohort of 76 dilated cardiomyopathy probands was used as a separate control dataset for polygenic risk score analysis.<sup>42</sup> An independent SCAD cohort of 384 cases recruited at the University of Leicester, used for validation of selected analyses, has been described previously.<sup>43</sup>

### *Clinical cohort characteristics assessment*

The cohort was examined for stressors at the time of SCAD. Chronic emotional stress included prolonged work-related bullying, caregiving for a seriously ill or disabled family member, financial distress, and intimate relationship breakdowns that occurred in the period directly preceding the subject's SCAD event. Pregnancy-related SCAD was defined as gestation until five months post-partum, as defined in other cardiovascular diseases.<sup>44</sup>

### *DNA extraction, sequencing, and processing*

Genomic DNA was extracted (PureLink GenomicDNA Mini Kit; Invitrogen) from buccal cells collected using a cheek swab. WGS was performed using paired end KAPA PCR-Free v2.1 libraries on the Illumina HiSeq X Ten platform with 30x coverage (Kinghorn Centre for Clinical Genomics, Sydney). Bioinformatic processing was based on that used for the MGRB cohort.<sup>41</sup> Reads were aligned to the GRCh37 reference genome with Burrows-Wheeler Aligner<sup>45</sup> and SNVs and INDELS were called with the Genome Analysis Toolkit Best Practices pipeline.<sup>46</sup> All variants were annotated with Annovar<sup>47</sup> against RefSeq (version 01-06-2017). Principal component analysis using 17,453 SNVs and projection to the 1000 Genomes principal components were used to confirm ethnicity (akt v0.3.2).<sup>48</sup> Non-relatedness of subjects in the cohort was confirmed with KING.<sup>49</sup>

### *Tier 1 and Tier 2 gene screen*

Our two-tiered list of 90 genes was based on eight diagnostic gene panels for CTDs, vasculopathies, and previous publications that identified gene mutations in CTD genes in SCAD patients (accessed December 2019, Supplementary Table 1). Tier 1 consisted of 75 genes confidently featured on one or more of eight CTD or vasculopathy gene panels (Supplementary Table 2) and are thus considered clinically actionable. Tier 2 contained 15 lower confidence genes from the eight panels or genes that were previously included in reports<sup>50, 51</sup> or identified as candidates.<sup>52-54</sup> SCAD cases carrying clinically actionable variants in any of these genes were contacted for follow-up relevant to the indicated disorder (Supplementary Table 3).

### *ACMG rare variant analysis*

Variant prioritization was performed using the Variant Prioritisation Ordering Tool (VPOT).<sup>55</sup> Variant classification was applied to all variants annotated to any gene in either tier of the gene list that had a gnomAD (v.2.1.1 used throughout) genomes pop-max minor allele frequency (MAF)  $\leq 1\%$  and that caused either frameshift, missense or nonsense changes, or were in a canonical splice site. Variant interpretation was based on American College of Medical Genetics (ACMG) guidelines<sup>56</sup> as determined by VarSome.<sup>57</sup> As such, the criteria relating to cohort frequencies or carrier or pedigree characteristics (PS4, PS2, PM3, PM6, PP1, PP4, BS4, BP2, BP5) were not considered. All variants classified as of uncertain significance (VUS), likely pathogenic (LP) or pathogenic (P) were visually verified with the Integrative Genomics Viewer (IGV).<sup>58</sup> ACMG rare variant analysis for the University of Leicester cohort was performed as previously described.<sup>43</sup>

### *Splice variant analysis*

Spliceogen<sup>59</sup> and SpliceAI<sup>60</sup> were used to identify potential splicing candidates within the list of rare (MAF  $\leq 1\%$  in any gnomAD genomes population) variants in Tier 1 genes. Candidate variants with a SpliceAI score  $\geq 0.4$  for any type of splicing alteration were visually verified and following manual review, only variants where a transcriptional consequence could be predicted were retained. Whole blood gene expression from GTEx<sup>61</sup> and nonsense mediated decay predictions (using NMD predictor<sup>62</sup> for such variants predicted to cause a frameshift or premature termination codon, otherwise manually) were used to determine the potential for detecting mis-spliced transcripts in patient whole blood.

### *Structural variant analysis*

Structural variants (SV) were called using GRIDSS v2.8.3,<sup>63</sup> Manta v1.6.0,<sup>64</sup> and CNVnator v0.4.1.<sup>65</sup> Very large SVs (>1 million nucleotides) were also called using ConanVarVar.<sup>66</sup> Deletions, indels, insertions, and duplications were identified from the GRIDSS-called BND records in a joint-call manner, using the jointsv software (<https://github.com/VCCRI/jointsv>). Only variants identified by at least two methods were considered, with a call by ConanVarVar required

for large SVs. Variants present in < 2.5% of the SCAD cohort and falling within our CTD and vasculopathy genes were assessed visually and for deleteriousness.

#### *Clinical comparisons between rare gene list variant carriers and non-carriers*

The clinical characteristics of SCAD cases identified to carry a rare, potentially deleterious variant in any Tier 1 or 2 gene and those of the remaining cases, were compared. All continuous variables were compared with t-tests, while binary variables were compared only where the presence of the characteristic was observed in at least 10 cases across the whole cohort, using Fisher's exact test.

#### *Rare variant collapsing analysis*

We assessed whether our entire gene list, tiers therein, or all genes throughout the genome, showed an enrichment of carriers of rare, predicted deleterious variants in cases compared to controls. To avoid confounding results due to ethnic differences, the rare variant collapsing analysis was confined to 88 SCAD samples clustering with the 1000 Genomes European superpopulation. We used the Medical Genome Reference Bank as controls; 1127 samples that were ethnically matched to cases were selected. This bank contains WGS data of Australians predominantly of European ancestry over 70 years of age, free from cardiovascular disease, degenerative neurological disorders and cancer. Variant filtering was performed using the variant selection criteria described in previous burden analyses.<sup>67</sup> Variants were considered to be rare if the gnomAD genome and exome non-Finnish European MAFs were  $\leq 1\%$ ; and were included for analysis if the consequence was a frameshift or nonsense alteration, an alteration of a canonical splice site, or a missense mutation with phred-scaled CADD > 12 and PolyPhen HDIV "P" or "D". Multiallelic variants in this cohort were excluded from the analysis, as were any variants with gnomAD exome or genome median coverage  $\leq 10$  for the given position. Genotypes were included only if genotype quality (GQ)  $\geq 30$ ; coverage was between 12 and 150 (exclusive); and, where heterozygous, the percentage of reads supporting the alternate allele exceeded 25%. Variants implicated in significant results were visually confirmed with IGV. Carriers of qualifying variants were determined per unit of analysis (individual gene or set of genes). For units with a minimum of two variant carriers, the proportion of cases and controls carrying at least one qualifying variant was compared with a one-sided

Fisher's exact test. Genome-wide results were corrected for multiple testing using the Benjamini and Hochberg's false discovery rate method, applied across all genes enriched in cases. Gene ontology enrichment analysis<sup>68</sup> was used for subsequent investigation of possible mechanisms.

Using the effect sizes observed in recent SCAD gene associations, we investigated our power to detect rare variant associations. For example, *TSR1* was initially identified by a rare variant enrichment analysis across 85 Han Chinese SCAD patients and 295 controls (Sun et al. 2019<sup>52</sup>). With 88 sporadic cases (using the European samples only) and 1127 controls, our power to detect an association of the same effect size was 95% at a significance level of  $< 8.94 \times 10^{-6}$  (using Bonferroni correction- as we are testing 5,591 genes that had variants in our cases).

#### *Novel loss-of-function (LoF) variants*

LoF variants across the whole genome that were absent from all gnomAD populations were identified with LOFTEE v1.0.3.<sup>69</sup> Variant reporting was limited to only those that were: determined by LOFTEE to be high confidence LoF variants with no flags; annotated to a gene considered to be intolerant to loss of function ( $LOEUF \leq 0.35$ );<sup>69</sup> present in fewer than 10 cases; present with an allelic balance  $\geq 0.15$ ; having a read depth  $\geq 8$ ; and passing visual inspection using IGV.

#### *Validation of genes containing novel loss-of-function variants*

Genes containing LoF variants absent from gnomAD but present in any of our 91 samples were assessed in our independent University of Leicester SCAD cohort. Variants were reported if they were classified "high impact" in SnpEff; had a DRAGEN variant QC "PASS" status; were absent from gnomAD; designated a high confidence LoF variant with LOFTEE; were annotated to a transcript with a CCDS; had an intracohort heterozygous carrier frequency  $< 5\%$ ; present with allelic balance  $\geq 30\%$  and had coverage  $\geq 10$ ; and passed visual inspection using IGV.

#### *Pathway analysis of LoF intolerant genes with novel LoF variants*

Pathway analysis was applied to genes identified as harboring novel LoF variants in at least one case. Overrepresentation analysis using Wikipathways 2019 (human) via Enrichr<sup>70</sup> was used to identify common pathways.

#### *Genes containing multiple rare structural variants*

To identify genes possibly related to SCAD outside of our CTD and vasculopathy list, LoF intolerant genes with any potentially damaging SVs were investigated. SVs present in a maximum of one sporadic sample, absent from SV databases, and affecting at least one exon of any gene intolerant to LoF ( $LOEUF \leq 0.35$ )<sup>69</sup>, were identified. All resulting variants were visually confirmed.

#### *Short Tandem Repeats (STRs) analysis*

We called STRs for multiple known pathogenic loci including the *FMR1* gene region using the intersect of three tools designed to detect STRs in WGS: TREDPARSE,<sup>71</sup> ExpansionHunter v3.2.2,<sup>72</sup> and exSTRa v1.1.0.<sup>73</sup>

#### *SCAD Polygenic Risk Scores (PRS)*

To investigate a polygenic contribution of common SNPs to SCAD, we calculated a PRS per sample for all cases and controls, which consisted of the sum of the risk alleles weighted by their effect sizes for the five significant SNPs identified from the first SCAD GWAS,<sup>74</sup> or the recent SCAD PRS<sup>75</sup> consisting of seven SNPs (supplementary table 14). Scores were compared between cohorts using the Kruskal Wallis rank sum test.

#### *Statistical Analysis*



All statistical tests were carried out in R (v 3.6).

### Supplemental Tables

**Supplementary Table I.** Gene list sources.

| Source                           | Panel                                          | N genes | N genes unique to this source |
|----------------------------------|------------------------------------------------|---------|-------------------------------|
| AmbryGenetics                    | TAADNext panel                                 | 35      | 0                             |
| CTGT                             | Connective tissue disorder panel               | 47      | 5                             |
| GeneDx                           | Heritable disorders of connective tissue panel | 57      | 5                             |
| Invitae                          | Aortopathy comprehensive panel                 | 27      | 1                             |
| PanelApp                         | Thoracic aortic aneurysm or dissection panel   | 63      | 10                            |
| PreventionGenetics               | Marfan syndrome and related aortopathies panel | 30      | 1                             |
| SonicGenetics                    | Aortopathy panel; vasculopathy panel           | 32      | 5                             |
| VCGS                             | Aortopathy panel                               | 17      | 0                             |
| Henkin et al. 2016 <sup>50</sup> | na                                             | 27      | 1                             |
| Kaadon et al. 2018 <sup>51</sup> | na                                             | 35      | 2                             |
| Fahey et al. 2018 <sup>54</sup>  | na                                             | 1       | 1                             |
| Turley et al. 2019 <sup>53</sup> | na                                             | 1       | 1                             |
| Sun et al. 2019 <sup>52</sup>    | na                                             | 1       | 1                             |

Supplementary Table II. Gene list.

| Gene     | Tier | Ambry Genetics | CTGT | GeneDx | Invitae | Invitae details | PanelApp | PanelAp confidence rating | Prevention Genetics | Sonic Genetics | VCGS | Henkin et al. 2016 <sup>50</sup> | Kaadan et al. 2018 <sup>11</sup> | Fahey et al. 2018 <sup>54</sup> | Turley et al. 2019 <sup>53</sup> | Sun et al. 2019 <sup>52</sup> |
|----------|------|----------------|------|--------|---------|-----------------|----------|---------------------------|---------------------|----------------|------|----------------------------------|----------------------------------|---------------------------------|----------------------------------|-------------------------------|
| ABL1     | 1    |                |      |        |         |                 | y        | green                     |                     |                |      |                                  |                                  |                                 |                                  |                               |
| ACTA2    | 1    | y              | y    | y      | y       |                 | y        | green                     | y                   | y              | y    | y                                | y                                |                                 |                                  |                               |
| ACVRL1   | 1    |                |      |        |         |                 |          |                           |                     | y              |      |                                  | y                                |                                 |                                  |                               |
| ADAMTS10 | 1    |                |      |        |         |                 |          |                           |                     | y              |      |                                  |                                  |                                 |                                  |                               |
| ADAMTS2  | 1    |                | y    | y      |         |                 | y        | red                       |                     |                |      |                                  |                                  |                                 |                                  |                               |
| ADAMTSL4 | 1    |                |      |        |         |                 | y        | green                     |                     |                |      |                                  |                                  |                                 |                                  |                               |
| AEBP1    | 1    |                | y    |        |         |                 |          |                           |                     |                |      |                                  |                                  |                                 |                                  |                               |
| ALDH18A1 | 1    |                |      | y      |         |                 | y        | red                       |                     |                |      |                                  |                                  |                                 |                                  |                               |
| ATP6VOA2 | 1    |                |      | y      |         |                 | y        | red                       |                     |                |      |                                  |                                  |                                 |                                  |                               |
| ATP6V1E1 | 1    |                |      | y      |         |                 |          |                           |                     |                |      |                                  |                                  |                                 |                                  |                               |
| ATP7A    | 1    |                | y    | y      |         |                 | y        | red                       |                     |                |      |                                  |                                  |                                 |                                  |                               |
| B3GALT6  | 1    |                | y    | y      |         |                 |          |                           |                     |                |      |                                  |                                  |                                 |                                  |                               |
| B3GAT3   | 1    |                |      | y      |         |                 |          |                           |                     |                |      |                                  |                                  |                                 |                                  |                               |
| B4GALT7  | 1    |                | y    | y      |         |                 | y        | red                       |                     |                |      |                                  |                                  |                                 |                                  |                               |
| BGN      | 1    | y              | y    | y      |         |                 | y        | green                     |                     |                |      |                                  |                                  |                                 |                                  |                               |
| C1R      | 1    |                | y    |        |         |                 |          |                           |                     |                |      |                                  |                                  |                                 |                                  |                               |
| C1S      | 1    |                | y    |        |         |                 |          |                           |                     |                |      |                                  |                                  |                                 |                                  |                               |
| CBS      | 1    | y              | y    | y      | y       |                 | y        | amber                     | y                   | y              | y    | y                                | y                                |                                 |                                  |                               |
| CHST14   | 1    | y              | y    | y      |         |                 | y        | red                       |                     |                |      |                                  |                                  |                                 |                                  |                               |
| COL11A1  | 1    |                |      | y      |         |                 | y        | red                       |                     |                |      |                                  |                                  |                                 |                                  |                               |
| COL11A2  | 1    |                |      | y      |         |                 | y        | red                       |                     |                |      |                                  |                                  |                                 |                                  |                               |
| COL12A1  | 1    |                | y    | y      |         |                 |          |                           |                     |                |      |                                  |                                  |                                 |                                  |                               |
| COL1A1   | 1    | y              | y    | y      |         |                 | y        | green                     |                     | y              | y    |                                  |                                  |                                 |                                  |                               |
| COL1A2   | 1    | y              | y    | y      |         |                 | y        | green                     |                     | y              |      |                                  |                                  |                                 |                                  |                               |
| COL2A1   | 1    |                |      | y      |         |                 | y        | red                       |                     |                |      |                                  |                                  |                                 |                                  |                               |
| COL3A1   | 1    | y              | y    | y      | y       |                 | y        | green                     | y                   | y              | y    | y                                | y                                |                                 |                                  |                               |
| COL4A1   | 1    |                |      |        |         |                 | y        | red                       |                     | y              |      |                                  |                                  |                                 |                                  |                               |







**Supplementary Table III. Phenotypic features sought for connective tissue disorders.**

| Disorder                                                     | Features                                                                                                                                                                                                                                                                                                                             |
|--------------------------------------------------------------|--------------------------------------------------------------------------------------------------------------------------------------------------------------------------------------------------------------------------------------------------------------------------------------------------------------------------------------|
| Marfan's syndrome<br>Congenital contractural arachnodactyly  | Height (taller than predicted, thin build, long fingers)<br>Heart (murmur) or blood vessel problems<br>Visual problems (extreme near sightedness, dislocated lens)<br>Curved spine<br>Collapsed lung<br>Crowded teeth<br>Chest bone (collapsed or protruding)<br>Stretch marks not related to rapid weight gain or loss<br>Flat feet |
| Ehlers Danlos syndrome                                       | Hypermobility of joints/joint dislocations/joint pain<br>Hyper-extensibility of skin/scarring/bruising<br>Scoliosis<br>Reduced muscle tone<br>Contractures<br>Heart valve problems - (mitral valve prolapse)<br>Gum disease<br>Blood vessel and bleeding problems                                                                    |
| Brain small vessel disease 1                                 | Vascular defects<br>Cerebral hemorrhage/bleeding disorders<br>Brain cysts<br>Seizures<br>Development/learning disorders<br>Vision problems                                                                                                                                                                                           |
| Congenital heart defects and skeletal malformations syndrome | Skeletal abnormalities<br>Congenital Heart disease<br>Unusual facial features<br>Contractures<br>Joint problems                                                                                                                                                                                                                      |
| Cutis laxa                                                   | Sagging (not stretchy) skin<br>Cardiovascular abnormalities                                                                                                                                                                                                                                                                          |

|                              |                                                                                                                                                                                                                                                                                                           |
|------------------------------|-----------------------------------------------------------------------------------------------------------------------------------------------------------------------------------------------------------------------------------------------------------------------------------------------------------|
|                              | <p>Inguinal or umbilical hernia<br/> Emphysema<br/> Seizures<br/> Blood vessel problems (narrowing, bulging, tearing of arteries)<br/> Loose joints<br/> Coarse hair<br/> Calcium deposits at base of skull (occipital horn syndrome)</p>                                                                 |
| Arterial tortuosity syndrome | <p>Tortuosity of major arteries including the aorta<br/> Hyper-extensible skin<br/> Hypermobility of joints<br/> Arachnodactyly<br/> Diaphragmatic hernia<br/> Keratoconus<br/> Aortic regurgitation<br/> Mental dysfunction<br/> Blepharophimosis</p>                                                    |
| Pseudoxanthoma elasticum     | <p>Premature atherosclerosis<br/> Skin (yellowish papular lesions)<br/> Skin laxity (neck axillae, groin)<br/> Visual distortion (angioid streaks/mineralisation of Bruch's membrane)<br/> Gastro-intestinal bleeding<br/> Coronary artery disease<br/> Intracranial aneurysm/subarachnoid hemorrhage</p> |
| Familial aneurysms           | <p>Visual problems (retinal tortuosity, cataracts)<br/> Kidney problems (hematuria, impaired renal function)<br/> Muscle cramps<br/> Aneurysms (intracranial)<br/> Strokes<br/> Blood vessel problems<br/> Anemia - (hemolytic)<br/> Heart rhythm problems<br/> Migraine with aura<br/> Seizures</p>      |

|                                       |                                                                                                                                                                                                                                                  |
|---------------------------------------|--------------------------------------------------------------------------------------------------------------------------------------------------------------------------------------------------------------------------------------------------|
| Fibrodysplasia ossificans progressiva | Joint and muscle problems<br>Toe malformation                                                                                                                                                                                                    |
| Weil-Marchesani syndrome              | Short stature<br>Broad head (brachycephaly)<br>Joint stiffness<br>Visual problems (round lenses/ <i>ectopia lentis</i> /myopia/glaucoma)<br>Heart/vessel defects (patent ductus/pulmonary stenosis/thoracic aneurysm/cervical artery dissection) |



**Supplementary Table IV.** Variants identified by ACMG (Tier 1 and 2) and splice variant (Tier 1 only) analysis in genes typically causing autosomal recessive disease where cases were heterozygous.

| Identified by ACMG                    |                 |      |                             |                    |                         |                        |                             |                          |
|---------------------------------------|-----------------|------|-----------------------------|--------------------|-------------------------|------------------------|-----------------------------|--------------------------|
| Case                                  | Gene            | Tier | Nucleotide variant          | Amino acid variant | gnomAD MAF <sup>^</sup> | Varsome ACMG criteria* |                             |                          |
| 095                                   | <i>AEBP1</i>    | 1    | NM_001129.5:c.1630+1G>A     | NA                 | 0.00003610              | PVS1, PM2, PP3, PP5    |                             |                          |
| 099                                   | <i>SLC2A10</i>  | 1    | NM_030777.4:c.1334delG      | p.Gly445Glu>Ter40  | 0.00008484              | PVS1, PM2, PP3, PP5    |                             |                          |
| 105                                   | <i>ABCC6</i>    | 2    | NM_001171.6:c.2787+1G>T     | NA                 | 0.0001169               | PVS1, PP3, PP5         |                             |                          |
| 109                                   |                 |      |                             |                    |                         |                        |                             |                          |
| Identified by splice variant analysis |                 |      |                             |                    |                         |                        |                             |                          |
| Case                                  | Gene            | Tier | Nucleotide variant          | Predicted effect   | gnomAD MAF <sup>^</sup> | SpliceAI score         | GTEX whole blood median TPM | Predicted to undergo NMD |
| 095                                   | <i>AEBP1</i>    | 1    | NM_001129.5:c.1630+1G>A     | Donor loss         | 0.0000361               | 0.99                   | 2.092                       | Y                        |
| 060                                   | <i>SLC39A13</i> | 1    | NM_001128225.3:c.735+362G>A | Acceptor gain      | 0.0022                  | 0.89                   | 9.01                        | Y                        |
| 074                                   | <i>LTBP4</i>    | 1    | ENST00000308370.7:c.476A>G  | Acceptor gain      | 0.00001784              | 0.88                   | 6.774                       | Y                        |
| 020                                   | <i>ADAMTS2</i>  | 1    | NM_014244.5:c.2457+822A>G   | Acceptor gain      | -                       | 0.81                   | 2.838                       | Y                        |
| 007                                   | <i>ADAMTS10</i> | 1    | NM_030957.4:c.1337+47G>A    | Donor gain         | 0.00331                 | 0.67                   | 3.093                       | Y                        |

ACMG, American College of Medical Genetics; MAF, minor allele frequency; TPM, transcripts per million; NMD, nonsense-mediated decay

\*ACMG classifications are automatically derived from Varsome and manually evaluated; <sup>^</sup>gnomAD MAF refers to all populations.

**Supplementary Table V.** Phenotypic data and history for cases with (likely) pathogenic or splice-altering variants in genes causative for a CTD.

| Sample | Sex | Gene            | Tier | Variant type      | Condition assessed       | Inheritance mode for condition <sup>^</sup> | Symptoms in case                        | Vascular symptoms reported in family | Notable SCAD details | Age at first SCAD | Other history*                                                                                                                                                                                                     |
|--------|-----|-----------------|------|-------------------|--------------------------|---------------------------------------------|-----------------------------------------|--------------------------------------|----------------------|-------------------|--------------------------------------------------------------------------------------------------------------------------------------------------------------------------------------------------------------------|
| 004    | F   | <i>FBN1</i>     | 1    | Likely pathogenic | Marfan syndrome          | AD                                          | None                                    |                                      |                      | 55                |                                                                                                                                                                                                                    |
| 007    | F   | <i>ADAMTS10</i> | 1    | Splice            | Weil-Marchesani syndrome | AR                                          | None                                    | Aortic dissection in maternal uncle  |                      | 58                | Breast cancer                                                                                                                                                                                                      |
| 020    | F   | <i>ADAMTS2</i>  | 1    | Splice            | Ehlers-Danlos syndrome   | AR                                          | Childhood scoliosis, some hypermobility |                                      | P-SCAD               | 41                | Carrier of X-linked myotubular myopathy                                                                                                                                                                            |
| 046    | F   | <i>MFAP5</i>    | 1    | Splice            | Familial aneurysms       | AD                                          | Carotid artery dissection               |                                      | 3 SCAD episodes      | 53                | Hypertension                                                                                                                                                                                                       |
| 060    | F   | <i>SLC39A13</i> | 1    | Splice            | Ehlers-Danlos syndrome   | AR                                          | None                                    |                                      |                      | 44                | Migraines; Graves' disease; Polymyalgia rheumatica in father; unknown autoimmune disorder in mother; rheumatoid arthritis, scleroderma, lupus (type unspecified), Graves' disease, and Raynaud's disease in sister |

|     |   |                 |   |                     |                                                              |    |      |                                          |                 |    |                                                                                                          |
|-----|---|-----------------|---|---------------------|--------------------------------------------------------------|----|------|------------------------------------------|-----------------|----|----------------------------------------------------------------------------------------------------------|
| 074 | F | <i>FBN2</i>     | 1 | Splice              | Congenital contractural arachnodactyly                       | AD | None |                                          |                 | 41 | Family history of stroke and sarcoidosis                                                                 |
|     |   | <i>LTBP4</i>    | 1 | Splice              | Cutis laxa                                                   | AR | None |                                          |                 |    |                                                                                                          |
| 090 | F | <i>ACVR1</i>    | 2 | Likely pathogenic   | Fibrodysplasia ossificans progressiva                        | AD | None |                                          |                 | 47 | Grandmother had large "stomach" aneurysm                                                                 |
|     |   | <i>ALDH18A1</i> | 1 | Likely pathogenic   | Cutis laxa                                                   | AD | None |                                          |                 |    |                                                                                                          |
| 091 | F | <i>ACVR1</i>    | 2 | Likely pathogenic   | Fibrodysplasia ossificans progressiva                        | AD | None | Cerebral aneurysm in maternal grand-aunt | P-SCAD          | 30 | Migraines; family history of SLE and antiphospholipid syndrome; cerebral aneurysm in maternal great aunt |
|     |   | <i>PRKG1</i>    | 1 | Splice              | Familial aneurysms                                           | AD | None |                                          |                 |    |                                                                                                          |
| 095 | F | <i>AEBP1</i>    | 1 | Pathogenic / splice | Ehlers-Danlos syndrome                                       | AR | None |                                          |                 | 43 | FMD; migraine                                                                                            |
| 099 | F | <i>SLC2A10</i>  | 1 | Pathogenic          | Arterial tortuosity syndrome                                 | AR | None |                                          |                 | 27 | Sjogren syndrome in sister, female first cousin had stroke due to aneurysm at 25 years                   |
| 105 | F | <i>ABCC6</i>    | 2 | Pathogenic          | Pseudoxanthoma elasticum                                     | AR | None |                                          | 3 SCAD episodes | 36 | FMD of carotid; lupus; stroke in maternal grandmother                                                    |
| 108 | F | <i>ABL1</i>     | 1 | Splice              | Congenital heart defects and skeletal malformations syndrome | AD | None |                                          |                 | 43 | Migraines; family history of stroke and kidney disease                                                   |

|     |   |               |   |                   |                              |    |                             |                                                                                                                            |                                             |    |                                                                           |
|-----|---|---------------|---|-------------------|------------------------------|----|-----------------------------|----------------------------------------------------------------------------------------------------------------------------|---------------------------------------------|----|---------------------------------------------------------------------------|
| 109 | F | <i>ABCC6</i>  | 2 | Pathogenic        | Pseudoxanthoma elasticum     | AR | None                        |                                                                                                                            |                                             | 41 | Graves' disease; father was recently diagnosed with an autoimmune disease |
| 115 | F | <i>FBN1</i>   | 1 | Likely pathogenic | Marfan syndrome              | AD | None                        | Maternal aunt had aneurysm in 40s                                                                                          |                                             | 32 |                                                                           |
| 146 | M | <i>COL3A1</i> | 1 | Pathogenic        | Ehlers-Danlos syndrome       | AD | None                        | Aortic dissection in paternal grandfather                                                                                  |                                             | 38 | Migraines                                                                 |
| 170 | F | <i>COL4A1</i> | 1 | Likely pathogenic | Brain small vessel disease 1 | AD | None                        | "Stomach" aneurysm in maternal grandfather                                                                                 | 2 SCAD episodes, 1 of which, pregnancy-SCAD | 35 | Migraines                                                                 |
| 171 | F | <i>COL4A1</i> | 1 | Likely pathogenic | Brain small vessel disease 1 | AD | Possible carotid dissection | Multiple family members with stroke; foetal intracranial haemorrhage leading to cerebral palsy and seizures in son of case | 2 SCAD episodes, 1 of which, pregnancy-SCAD | 30 | Migraines; tall stature; high, arched palate                              |

P-SCAD, pregnancy related SCAD.

^Inheritance mode for specific form of condition listed which is associated with given gene; \*Limited to vascular, connective tissue, inflammatory, and hormonal conditions in case and family

**Supplementary Table VI. VUS only Carriers.**

| Sample | Gene            | Tier | Variant                                 |
|--------|-----------------|------|-----------------------------------------|
| 007    | <i>DCHS1</i>    | 1    | <i>DCHS1</i> (NM_003737.4):c.6062G>A    |
| 011    | <i>ADAMTSL4</i> | 1    | <i>ADAMTSL4</i> (NM_019032.5):c.1700G>A |
|        | <i>C1S</i>      | 1    | <i>C1S</i> (NM_201442.4):c.475C>A       |
| 012    | <i>FLNB</i>     | 1    | <i>FLNB</i> (NM_001164317.2):c.2104G>A  |
| 019    | <i>EFEMP2</i>   | 1    | <i>EFEMP2</i> (NM_016938.5):c.202G>C    |
|        | <i>SKI</i>      | 1    | <i>SKI</i> (NM_003036.4):c.723C>G       |
| 020    | <i>TLN1</i>     | 2    | <i>TLN1</i> (NM_006289.4):c.907C>T      |
| 024    | <i>DSE</i>      | 1    | <i>DSE</i> (NM_001080976.3):c.2842T>C   |
|        | <i>PKD1</i>     | 1    | <i>PKD1</i> (NM_001009944.3):c.8543T>C  |
| 034    | <i>FLNB</i>     | 1    | <i>FLNB</i> (NM_001164317.2):c.7134C>A  |
|        | <i>PYCR1</i>    | 1    | <i>PYCR1</i> (NM_006907.4):c.334C>T     |
|        | <i>RASA1</i>    | 2    | <i>RASA1</i> (NM_002890.3):c.3133G>T    |
| 049    | <i>COL12A1</i>  | 1    | <i>COL12A1</i> (NM_004370.6):c.1775C>T  |
| 050    | <i>B4GALT7</i>  | 1    | <i>B4GALT7</i> (NM_007255.3):c.38G>A    |
| 053    | <i>TNXB</i>     | 1    | <i>TNXB</i> (NM_019105.8):c.12350G>A    |
| 055    | <i>TNXB</i>     | 1    | <i>TNXB</i> (NM_019105.8):c.9230C>T     |
| 061    | <i>COL9A1</i>   | 1    | <i>COL9A1</i> (NM_001851.5):c.827C>T    |
| 064    | <i>TNXB</i>     | 1    | <i>TNXB</i> (NM_019105.8):c.9254T>C     |
| 065    | <i>TNXB</i>     | 1    | <i>TNXB</i> (NM_019105.8):c.12350G>A    |
| 073    | <i>TSR1</i>     | 2    | <i>TSR1</i> (NM_018128.5):c.2333C>T     |
| 074    | <i>COL5A1</i>   | 1    | <i>COL5A1</i> (NM_001278074.1):c.452A>G |

|     |                 |   |                                           |
|-----|-----------------|---|-------------------------------------------|
|     | <i>FLNA</i>     | 1 | <i>FLNA</i> (NM_001110556.2):c.3323G>A    |
|     | <i>LTBP3</i>    | 1 | <i>LTBP3</i> (NM_001130144.2):c.1684C>G   |
| 078 | <i>ALDH18A1</i> | 1 | <i>ALDH18A1</i> (NM_002860.4):c.71C>T     |
| 079 | <i>COL5A1</i>   | 1 | <i>COL5A1</i> (NM_001278074.1):c.4892C>T  |
| 092 | <i>TSR1</i>     | 2 | <i>TSR1</i> (NM_018128.5):c.2333C>T       |
| 093 | <i>TNXB</i>     | 1 | <i>TNXB</i> (NM_019105.8):c.12350G>A      |
|     | <i>TNXB</i>     | 1 | <i>TNXB</i> (NM_019105.8):c.2018A>C       |
| 098 | <i>ADAMTS2</i>  | 1 | <i>ADAMTS2</i> (NM_014244.5):c.1903G>A    |
| 108 | <i>COL11A1</i>  | 1 | <i>COL11A1</i> (NM_001854.4):c.2921C>A    |
|     | <i>LTBP2</i>    | 2 | <i>LTBP2</i> (NM_000428.3):c.221A>G       |
| 117 | <i>FBN2</i>     | 1 | <i>FBN2</i> (NM_001999.4):c.8444A>C       |
|     | <i>FLNB</i>     | 1 | <i>FLNB</i> (NM_001164317.2):c.2198G>A    |
| 122 | <i>ABL1</i>     | 1 | <i>ABL1</i> (NM_007313.2):c.1604G>A       |
|     | <i>COL9A2</i>   | 1 | <i>COL9A2</i> (NM_001852.4):c.1561A>G     |
| 124 | <i>FLNB</i>     | 1 | <i>FLNB</i> (NM_001164317.2):c.4507G>A    |
| 126 | <i>COL11A1</i>  | 1 | <i>COL11A1</i> (NM_001854.4):c.1408G>C    |
|     | <i>NOTCH1</i>   | 1 | <i>NOTCH1</i> (NM_017617.5):c.2128G>A     |
| 127 | <i>FLNB</i>     | 1 | <i>FLNB</i> (NM_001164317.2):c.4507G>A    |
|     | <i>ZNF469</i>   | 1 | <i>ZNF469</i> (NM_001367624.2):c.11425G>A |
| 129 | <i>EMILIN1</i>  | 2 | <i>EMILIN1</i> (NM_007046.4):c.2237G>T    |
|     | <i>TNXB</i>     | 1 | <i>TNXB</i> (NM_019105.8):c.12350G>A      |
| 137 | <i>MTHFR</i>    | 2 | <i>MTHFR</i> (NM_005957.5):c.673A>G       |
|     | <i>PRKG1</i>    | 1 | <i>PRKG1</i> (NM_006258.4):c.1964T>C      |
| 143 | <i>FLNB</i>     | 1 | <i>FLNB</i> (NM_001164317.2):c.2453G>A    |
|     | <i>LTBP2</i>    | 2 | <i>LTBP2</i> (NM_000428.3):c.3931A>C      |
|     | <i>PRDM5</i>    | 1 | <i>PRDM5</i> (NM_018699.3):c.1712A>G      |

|     |                 |   |                                        |
|-----|-----------------|---|----------------------------------------|
| 145 | <i>COL12A1</i>  | 1 | <i>COL12A1</i> (NM_004370.6):c.5588G>T |
| 147 | <i>COL11A2</i>  | 1 | <i>COL11A2</i> (NM_080680.3):c.2249T>C |
| 148 | <i>FBN1</i>     | 1 | <i>FBN1</i> (NM_000138.5):c.4612A>G    |
| 150 | <i>COL9A1</i>   | 1 | <i>COL9A1</i> (NM_001851.5):c.2527C>T  |
| 151 | <i>ATP6VOA2</i> | 1 | <i>ATP6VOA2</i> (NM_012463.4):c.776G>A |
|     | <i>COL12A1</i>  | 1 | <i>COL12A1</i> (NM_004370.6):c.4980C>G |
| 154 | <i>PLOD1</i>    | 1 | <i>PLOD1</i> (NM_000302.4):c.303C>T    |
| 155 | <i>COL9A1</i>   | 1 | <i>COL9A1</i> (NM_001851.5):c.2543G>A  |
|     | <i>TSR1</i>     | 2 | <i>TSR1</i> (NM_018128.5):c.1A>G       |
| 156 | <i>MTHFR</i>    | 2 | <i>MTHFR</i> (NM_005957.5):c.1409A>T   |
| 164 | <i>KCNN1</i>    | 2 | <i>KCNN1</i> (NM_002248.4):c.65G>A     |
| 193 | <i>COL11A2</i>  | 1 | <i>COL11A2</i> (NM_080680.3):c.3824C>T |

**Supplementary Table VII.** Splice variants with lower SpliceAI scores (<0.4) but ultra rare (<0.001) in gnomAD.

| Case | Sex | Gene          | Variant (hg19)                                            | Inheritance mode for condition | Predicted effect | gnomAD MAF (all samples) | gnomAD homozygote count | SpliceAI score |
|------|-----|---------------|-----------------------------------------------------------|--------------------------------|------------------|--------------------------|-------------------------|----------------|
| 137  | F   | <i>FLNB</i>   | NM_001164317.2:c.292+33392G>A                             | AD                             | Donor gain       | -                        | -                       | 0.34           |
| 099  | F   | <i>ELN</i>    | NM_000501.4:c.232+100_232+101insACTGACCTGGACTGCACTGACGGTG | AD                             | Acceptor gain    | -                        | -                       | 0.28           |
| 010  | F   | <i>COL2A1</i> | NM_001844.5:c.1122+346C>G                                 | AD                             | Donor gain       | 0.0001274                | 0                       | 0.23           |



**Supplementary Table VIII.** Samples and genes carrying qualifying variants within our CTD gene list.

| <b>Sample</b> | <b>Tier 1 gene(s)</b> | <b>Tier 2 gene(s)</b> | <b>N variants</b> |
|---------------|-----------------------|-----------------------|-------------------|
| 090           | <i>ALDH18A1</i>       |                       | 1                 |
| 037           | <i>COL11A1</i>        |                       | 1                 |
| 065           | <i>COL11A2</i>        |                       | 1                 |
| 049           | <i>COL12A1</i>        |                       | 1                 |
| 087           | <i>COL12A1</i>        |                       | 1                 |
| 031           | <i>COL5A1</i>         |                       | 1                 |
| 060           | <i>COL5A1</i>         |                       | 1                 |
| 079           | <i>COL5A1</i>         |                       | 1                 |
| 001           | <i>COL5A2</i>         |                       | 1                 |
| 155           | <i>COL9A1</i>         |                       | 1                 |
| 022           | <i>COL9A2</i>         |                       | 1                 |
| 007           | <i>DCHS1</i>          |                       | 1                 |
| 024           | <i>DSE</i>            |                       | 1                 |
| 115           | <i>FBN1</i>           |                       | 1                 |
| 010           | <i>FBN2</i>           |                       | 1                 |
| 149           | <i>FBN2</i>           |                       | 1                 |
| 164           | <i>FBN2</i>           |                       | 1                 |
| 017           | <i>FLCN</i>           |                       | 1                 |
| 054           | <i>FLNB</i>           |                       | 1                 |
| 131           | <i>MYH11</i>          |                       | 1                 |
| 023           | <i>PKD1</i>           |                       | 1                 |
| 123           | <i>PKD1</i>           |                       | 1                 |

|     |                         |                |   |
|-----|-------------------------|----------------|---|
| 130 | <i>PLOD1</i>            |                | 1 |
| 154 | <i>PLOD1</i>            |                | 1 |
| 162 | <i>PLOD1</i>            |                | 1 |
| 111 | <i>RIN2</i>             |                | 1 |
| 109 | <i>TGFB2</i>            |                | 1 |
| 134 | <i>TGFBR2</i>           |                | 1 |
| 028 | <i>TNXB</i>             |                | 1 |
| 064 | <i>TNXB</i>             |                | 1 |
| 093 | <i>TNXB</i>             |                | 1 |
| 089 | <i>ZNF469</i>           |                | 1 |
| 097 | <i>ZNF469</i>           |                | 1 |
| 127 | <i>ZNF469</i>           |                | 1 |
| 129 |                         | <i>EMILIN1</i> | 1 |
| 041 | <i>FLNA</i>             | <i>TLN1</i>    | 2 |
| 040 | <i>ADAMTS10, ELN</i>    |                | 2 |
| 098 | <i>ADAMTS2, PKD1</i>    |                | 2 |
| 108 | <i>COL11A1, COL5A1</i>  |                | 2 |
| 193 | <i>COL11A2, COL2A1</i>  |                | 2 |
| 145 | <i>COL12A1, COL4A1</i>  |                | 2 |
| 099 | <i>COL12A1, SLC2A10</i> |                | 2 |
| 171 | <i>COL1A2, COL4A1</i>   |                | 2 |
| 052 | <i>COL4A1, NOTCH1</i>   |                | 2 |
| 121 | <i>COL4A1, TGFB2</i>    |                | 2 |
| 034 | <i>COL5A2, FLNB</i>     |                | 2 |
| 137 | <i>COL5A2, PRKG1</i>    |                | 2 |

|     |                                  |                   |   |
|-----|----------------------------------|-------------------|---|
| 105 | <i>COL9A3, FBN2</i>              |                   | 2 |
| 078 | <i>COL9A3, MYH11</i>             |                   | 2 |
| 085 | <i>COL9A3, TNXB</i>              |                   | 2 |
| 019 | <i>DCHS1, EFEMP2</i>             |                   | 2 |
| 156 | <i>FBN2, PKD1</i>                |                   | 2 |
| 074 | <i>FLNA, LTBP3</i>               |                   | 2 |
| 051 | <i>FLNA, NOTCH1</i>              |                   | 2 |
| 143 | <i>FLNB, PRDM5</i>               |                   | 2 |
| 124 | <i>PKD1, PKD1</i>                |                   | 2 |
| 147 | <i>ABL1, COL11A2</i>             | <i>TSR1</i>       | 3 |
| 092 | <i>B3GALT6, PKD2</i>             | <i>TSR1</i>       | 3 |
| 020 | <i>MYH11, NOTCH1</i>             | <i>TLN1</i>       | 3 |
| 122 | <i>ABL1, AEBP1, COL9A2</i>       |                   | 3 |
| 053 | <i>ABL1, MYH11, TNXB</i>         |                   | 3 |
| 061 | <i>ACVRL1, COL9A1, TGFB2</i>     |                   | 3 |
| 150 | <i>ADAMTS10, COL9A1, PKD1</i>    |                   | 3 |
| 117 | <i>ADAMTS10, FLNB, PKD1</i>      |                   | 3 |
| 043 | <i>COL11A2, PKD2, TNXB</i>       |                   | 3 |
| 086 | <i>COL12A1, FBN2, PKD1</i>       |                   | 3 |
| 146 | <i>COL3A1, FLNB, ZNF469</i>      |                   | 3 |
| 170 | <i>COL4A1, MYH11, TNXB</i>       |                   | 3 |
| 091 | <i>COL11A2, COL11A2</i>          | <i>TLN1, TLN1</i> | 4 |
| 011 | <i>ADAMTSL4, C1S, TNXB, TNXB</i> |                   | 4 |
| 095 | <i>AEBP1, FBN2, FBN2, FLNB</i>   |                   | 4 |

|     |                                                   |  |   |
|-----|---------------------------------------------------|--|---|
| 151 | <i>ATP6V0A2, COL12A1, COL9A3, NOTCH1</i>          |  | 4 |
| 012 | <i>COL11A1, COL4A1, COL5A1, FLNB</i>              |  | 4 |
| 055 | <i>ABL1, COL2A1, FLNA, MED12, TNXB</i>            |  | 5 |
| 159 | <i>ATP6V0A2, COL5A1, FBN2, MYH11, PKD1</i>        |  | 5 |
| 126 | <i>COL11A1, COL9A3, FBLN5, NOTCH1, PKD1, PKD1</i> |  | 6 |

**Supplementary Table IX.** Nominally significant genes identified by genome-wide collapsing analysis.

| Gene            | P-value     | FDR adjusted p-value | N case carriers | N case non-carriers | N control carriers | N control non-carriers | Odds ratio  |
|-----------------|-------------|----------------------|-----------------|---------------------|--------------------|------------------------|-------------|
| <i>AFDN</i>     | 0.000121881 | 0.432251693          | 4               | 84                  | 1                  | 1126                   | 53.21015157 |
| <i>ACAT2</i>    | 0.00034539  | 0.432251693          | 4               | 84                  | 2                  | 1125                   | 26.58486719 |
| <i>KIR2DL1</i>  | 0.000367997 | 0.432251693          | 3               | 85                  | 0                  | 1127                   | Inf         |
| <i>TMEM236</i>  | 0.000367997 | 0.432251693          | 3               | 85                  | 0                  | 1127                   | Inf         |
| <i>PCDHA4</i>   | 0.000391543 | 0.432251693          | 8               | 80                  | 19                 | 1108                   | 5.814034541 |
| <i>MARF1</i>    | 0.000509594 | 0.432251693          | 10              | 78                  | 32                 | 1095                   | 4.377716008 |
| <i>PCNX2</i>    | 0.000541184 | 0.432251693          | 6               | 82                  | 10                 | 1117                   | 8.14228439  |
| <i>PCNX3</i>    | 0.001110021 | 0.478192981          | 13              | 75                  | 58                 | 1069                   | 3.190056812 |
| <i>DUSP15</i>   | 0.001394564 | 0.478192981          | 3               | 85                  | 1                  | 1126                   | 39.39527901 |
| <i>MAJIN</i>    | 0.001394564 | 0.478192981          | 3               | 85                  | 1                  | 1126                   | 39.39527901 |
| <i>PIGB</i>     | 0.001394564 | 0.478192981          | 3               | 85                  | 1                  | 1126                   | 39.39527901 |
| <i>HCRTR1</i>   | 0.001438658 | 0.478192981          | 4               | 84                  | 4                  | 1123                   | 13.29747774 |
| <i>RUBCNL</i>   | 0.001438658 | 0.478192981          | 4               | 84                  | 4                  | 1123                   | 13.29747774 |
| <i>MRPL13</i>   | 0.00144135  | 0.478192981          | 5               | 83                  | 8                  | 1119                   | 8.393617142 |
| <i>ZNF134</i>   | 0.00144135  | 0.478192981          | 5               | 83                  | 8                  | 1119                   | 8.393617142 |
| <i>PIGM</i>     | 0.00211509  | 0.478192981          | 5               | 83                  | 9                  | 1118                   | 7.456592061 |
| <i>TOGARAM2</i> | 0.00211509  | 0.478192981          | 5               | 83                  | 9                  | 1118                   | 7.456592061 |
| <i>TCTE1</i>    | 0.002446935 | 0.478192981          | 4               | 84                  | 5                  | 1122                   | 10.63631041 |
| <i>ITGA2B</i>   | 0.002993141 | 0.478192981          | 5               | 83                  | 10                 | 1117                   | 6.706891842 |
| <i>LUC7L</i>    | 0.002993141 | 0.478192981          | 5               | 83                  | 10                 | 1117                   | 6.706891842 |
| <i>SYCP2</i>    | 0.002993141 | 0.478192981          | 5               | 83                  | 10                 | 1117                   | 6.706891842 |
| <i>KRT12</i>    | 0.003096539 | 0.478192981          | 8               | 80                  | 28                 | 1099                   | 3.91785029  |

|                 |             |             |   |    |    |      |             |
|-----------------|-------------|-------------|---|----|----|------|-------------|
| <i>CATSPERE</i> | 0.003303588 | 0.478192981 | 3 | 85 | 2  | 1125 | 19.72810852 |
| <i>MAEA</i>     | 0.003303588 | 0.478192981 | 3 | 85 | 2  | 1125 | 19.72810852 |
| <i>OR2T3</i>    | 0.003303588 | 0.478192981 | 3 | 85 | 2  | 1125 | 19.72810852 |
| <i>RAD1</i>     | 0.003303588 | 0.478192981 | 3 | 85 | 2  | 1125 | 19.72810852 |
| <i>TTC38</i>    | 0.003677168 | 0.478192981 | 9 | 79 | 36 | 1091 | 3.446866947 |
| <i>BPIFA2</i>   | 0.003719271 | 0.478192981 | 8 | 80 | 29 | 1098 | 3.778874862 |
| <i>ACOT13</i>   | 0.003854008 | 0.478192981 | 4 | 84 | 6  | 1121 | 8.861188073 |
| <i>C3orf20</i>  | 0.003854008 | 0.478192981 | 4 | 84 | 6  | 1121 | 8.861188073 |
| <i>FBXO39</i>   | 0.003854008 | 0.478192981 | 4 | 84 | 6  | 1121 | 8.861188073 |
| <i>GNRH1</i>    | 0.003854008 | 0.478192981 | 4 | 84 | 6  | 1121 | 8.861188073 |
| <i>HEXB</i>     | 0.003854008 | 0.478192981 | 4 | 84 | 6  | 1121 | 8.861188073 |
| <i>HLA-C</i>    | 0.003854008 | 0.478192981 | 4 | 84 | 6  | 1121 | 8.861188073 |
| <i>KLHL21</i>   | 0.003854008 | 0.478192981 | 4 | 84 | 6  | 1121 | 8.861188073 |
| <i>ITGA7</i>    | 0.004503157 | 0.478192981 | 6 | 82 | 17 | 1110 | 4.766272119 |
| <i>SIX6</i>     | 0.004503157 | 0.478192981 | 6 | 82 | 17 | 1110 | 4.766272119 |
| <i>AKR1C1</i>   | 0.005190473 | 0.478192981 | 2 | 86 | 0  | 1127 | Inf         |
| <i>BICDL1</i>   | 0.005190473 | 0.478192981 | 2 | 86 | 0  | 1127 | Inf         |
| <i>C12orf65</i> | 0.005190473 | 0.478192981 | 2 | 86 | 0  | 1127 | Inf         |
| <i>C2CD6</i>    | 0.005190473 | 0.478192981 | 2 | 86 | 0  | 1127 | Inf         |
| <i>CASTOR1</i>  | 0.005190473 | 0.478192981 | 2 | 86 | 0  | 1127 | Inf         |
| <i>CHCHD5</i>   | 0.005190473 | 0.478192981 | 2 | 86 | 0  | 1127 | Inf         |
| <i>DLX6</i>     | 0.005190473 | 0.478192981 | 2 | 86 | 0  | 1127 | Inf         |
| <i>FEM1B</i>    | 0.005190473 | 0.478192981 | 2 | 86 | 0  | 1127 | Inf         |
| <i>GM2A</i>     | 0.005190473 | 0.478192981 | 2 | 86 | 0  | 1127 | Inf         |
| <i>GPR171</i>   | 0.005190473 | 0.478192981 | 2 | 86 | 0  | 1127 | Inf         |

|                 |             |             |    |    |    |      |             |
|-----------------|-------------|-------------|----|----|----|------|-------------|
| <i>KAT7</i>     | 0.005190473 | 0.478192981 | 2  | 86 | 0  | 1127 | Inf         |
| <i>KRTAP9-9</i> | 0.005190473 | 0.478192981 | 2  | 86 | 0  | 1127 | Inf         |
| <i>LIN28B</i>   | 0.005190473 | 0.478192981 | 2  | 86 | 0  | 1127 | Inf         |
| <i>MFSD13A</i>  | 0.005190473 | 0.478192981 | 2  | 86 | 0  | 1127 | Inf         |
| <i>PGGHG</i>    | 0.005190473 | 0.478192981 | 2  | 86 | 0  | 1127 | Inf         |
| <i>SRPRA</i>    | 0.005190473 | 0.478192981 | 2  | 86 | 0  | 1127 | Inf         |
| <i>TMEM174</i>  | 0.005190473 | 0.478192981 | 2  | 86 | 0  | 1127 | Inf         |
| <i>TMEM69</i>   | 0.005190473 | 0.478192981 | 2  | 86 | 0  | 1127 | Inf         |
| <i>TRIM43</i>   | 0.005190473 | 0.478192981 | 2  | 86 | 0  | 1127 | Inf         |
| <i>ZBTB26</i>   | 0.005190473 | 0.478192981 | 2  | 86 | 0  | 1127 | Inf         |
| <i>WDR17</i>    | 0.005406493 | 0.478192981 | 13 | 75 | 71 | 1056 | 2.575204636 |
| <i>C1orf100</i> | 0.005659478 | 0.478192981 | 6  | 82 | 18 | 1109 | 4.498075118 |
| <i>KDELC2</i>   | 0.005659478 | 0.478192981 | 6  | 82 | 18 | 1109 | 4.498075118 |
| <i>ALB</i>      | 0.005723989 | 0.478192981 | 4  | 84 | 7  | 1120 | 7.591424562 |
| <i>CCDC28B</i>  | 0.005723989 | 0.478192981 | 4  | 84 | 7  | 1120 | 7.591424562 |
| <i>MFSD14B</i>  | 0.005723989 | 0.478192981 | 4  | 84 | 7  | 1120 | 7.591424562 |
| <i>NAP1L5</i>   | 0.005723989 | 0.478192981 | 4  | 84 | 7  | 1120 | 7.591424562 |
| <i>NHS</i>      | 0.005723989 | 0.478192981 | 4  | 84 | 7  | 1120 | 7.591424562 |
| <i>ZNF880</i>   | 0.005723989 | 0.478192981 | 4  | 84 | 7  | 1120 | 7.591424562 |
| <i>KANK1</i>    | 0.005730447 | 0.478192981 | 12 | 76 | 63 | 1064 | 2.663561865 |
| <i>CHDH</i>     | 0.006261786 | 0.493093637 | 3  | 85 | 3  | 1124 | 13.15319121 |
| <i>FAM196A</i>  | 0.006261786 | 0.493093637 | 3  | 85 | 3  | 1124 | 13.15319121 |
| <i>MRNIP</i>    | 0.006261786 | 0.493093637 | 3  | 85 | 3  | 1124 | 13.15319121 |
| <i>ZBTB9</i>    | 0.006261786 | 0.493093637 | 3  | 85 | 3  | 1124 | 13.15319121 |
| <i>COL4A1</i>   | 0.007019532 | 0.537151571 | 6  | 82 | 19 | 1108 | 4.258119397 |

|                  |             |             |   |    |    |      |             |
|------------------|-------------|-------------|---|----|----|------|-------------|
| <i>MFSD2B</i>    | 0.007174271 | 0.537151571 | 5 | 83 | 13 | 1114 | 5.148880243 |
| <i>BNC1</i>      | 0.008115824 | 0.537151571 | 4 | 84 | 8  | 1119 | 6.639021612 |
| <i>UGT2A3</i>    | 0.008115824 | 0.537151571 | 4 | 84 | 8  | 1119 | 6.639021612 |
| <i>CHAT</i>      | 0.008602452 | 0.537151571 | 6 | 82 | 20 | 1107 | 4.042184895 |
| <i>TMEM139</i>   | 0.008602452 | 0.537151571 | 6 | 82 | 20 | 1107 | 4.042184895 |
| <i>TNRC6A</i>    | 0.008602452 | 0.537151571 | 6 | 82 | 20 | 1107 | 4.042184895 |
| <i>ADGRE1</i>    | 0.009188611 | 0.537151571 | 5 | 83 | 14 | 1113 | 4.777702178 |
| <i>COL4A2</i>    | 0.009188611 | 0.537151571 | 5 | 83 | 14 | 1113 | 4.777702178 |
| <i>PPIC</i>      | 0.009729107 | 0.537151571 | 8 | 80 | 35 | 1092 | 3.115461716 |
| <i>CD37</i>      | 0.010387115 | 0.537151571 | 3 | 85 | 4  | 1123 | 9.865463287 |
| <i>DSC2</i>      | 0.010387115 | 0.537151571 | 3 | 85 | 4  | 1123 | 9.865463287 |
| <i>FBXL5</i>     | 0.010387115 | 0.537151571 | 3 | 85 | 4  | 1123 | 9.865463287 |
| <i>GGCT</i>      | 0.010387115 | 0.537151571 | 3 | 85 | 4  | 1123 | 9.865463287 |
| <i>KLHL11</i>    | 0.010387115 | 0.537151571 | 3 | 85 | 4  | 1123 | 9.865463287 |
| <i>MBOAT2</i>    | 0.010387115 | 0.537151571 | 3 | 85 | 4  | 1123 | 9.865463287 |
| <i>MPHOSPH10</i> | 0.010387115 | 0.537151571 | 3 | 85 | 4  | 1123 | 9.865463287 |
| <i>PACRG</i>     | 0.010387115 | 0.537151571 | 3 | 85 | 4  | 1123 | 9.865463287 |
| <i>PCNX4</i>     | 0.010387115 | 0.537151571 | 3 | 85 | 4  | 1123 | 9.865463287 |
| <i>PDHA2</i>     | 0.010387115 | 0.537151571 | 3 | 85 | 4  | 1123 | 9.865463287 |
| <i>PPWD1</i>     | 0.010387115 | 0.537151571 | 3 | 85 | 4  | 1123 | 9.865463287 |
| <i>SKIDA1</i>    | 0.010387115 | 0.537151571 | 3 | 85 | 4  | 1123 | 9.865463287 |
| <i>SLC38A11</i>  | 0.010387115 | 0.537151571 | 3 | 85 | 4  | 1123 | 9.865463287 |
| <i>TCP10</i>     | 0.010387115 | 0.537151571 | 3 | 85 | 4  | 1123 | 9.865463287 |
| <i>TRIM54</i>    | 0.010387115 | 0.537151571 | 3 | 85 | 4  | 1123 | 9.865463287 |
| <i>CEP112</i>    | 0.010398261 | 0.537151571 | 7 | 81 | 28 | 1099 | 3.386465468 |



|                  |             |             |   |    |    |      |             |
|------------------|-------------|-------------|---|----|----|------|-------------|
| <i>MYO9B</i>     | 0.010398261 | 0.537151571 | 7 | 81 | 28 | 1099 | 3.386465468 |
| <i>CHIT1</i>     | 0.010427099 | 0.537151571 | 6 | 82 | 21 | 1106 | 3.845933479 |
| <i>GP2</i>       | 0.011082258 | 0.537151571 | 4 | 84 | 9  | 1118 | 5.897099279 |
| <i>IKZF4</i>     | 0.011082258 | 0.537151571 | 4 | 84 | 9  | 1118 | 5.897099279 |
| <i>OGFR</i>      | 0.011082258 | 0.537151571 | 4 | 84 | 9  | 1118 | 5.897099279 |
| <i>REC8</i>      | 0.011082258 | 0.537151571 | 4 | 84 | 9  | 1118 | 5.897099279 |
| <i>SOGA1</i>     | 0.011082258 | 0.537151571 | 4 | 84 | 9  | 1118 | 5.897099279 |
| <i>NUMA1</i>     | 0.01119651  | 0.537151571 | 8 | 80 | 36 | 1091 | 3.026309907 |
| <i>CCR9</i>      | 0.011563041 | 0.537151571 | 5 | 83 | 15 | 1112 | 4.455968812 |
| <i>OR51G2</i>    | 0.011563041 | 0.537151571 | 5 | 83 | 15 | 1112 | 4.455968812 |
| <i>GPAT2</i>     | 0.012160745 | 0.537151571 | 7 | 81 | 29 | 1098 | 3.266950239 |
| <i>PARM1</i>     | 0.012160745 | 0.537151571 | 7 | 81 | 29 | 1098 | 3.266950239 |
| <i>HIP1R</i>     | 0.01251187  | 0.537151571 | 6 | 82 | 22 | 1105 | 3.668429136 |
| <i>C17orf107</i> | 0.01432493  | 0.537151571 | 5 | 83 | 16 | 1111 | 4.174475428 |
| <i>CD36</i>      | 0.01432493  | 0.537151571 | 5 | 83 | 16 | 1111 | 4.174475428 |
| <i>GDPD5</i>     | 0.014669125 | 0.537151571 | 4 | 84 | 10 | 1117 | 5.305733587 |
| <i>MARCH9</i>    | 0.014669125 | 0.537151571 | 4 | 84 | 10 | 1117 | 5.305733587 |
| <i>MS4A6A</i>    | 0.014669125 | 0.537151571 | 4 | 84 | 10 | 1117 | 5.305733587 |
| <i>NCBP3</i>     | 0.014669125 | 0.537151571 | 4 | 84 | 10 | 1117 | 5.305733587 |
| <i>SERPINA9</i>  | 0.014669125 | 0.537151571 | 4 | 84 | 10 | 1117 | 5.305733587 |
| <i>SGK2</i>      | 0.014669125 | 0.537151571 | 4 | 84 | 10 | 1117 | 5.305733587 |
| <i>ABHD18</i>    | 0.014835425 | 0.537151571 | 2 | 86 | 1  | 1126 | 25.99047006 |
| <i>ACTL10</i>    | 0.014835425 | 0.537151571 | 2 | 86 | 1  | 1126 | 25.99047006 |
| <i>ACVR1</i>     | 0.014835425 | 0.537151571 | 2 | 86 | 1  | 1126 | 25.99047006 |
| <i>C17orf75</i>  | 0.014835425 | 0.537151571 | 2 | 86 | 1  | 1126 | 25.99047006 |

|                 |             |             |   |    |   |      |             |
|-----------------|-------------|-------------|---|----|---|------|-------------|
| <i>C4BPA</i>    | 0.014835425 | 0.537151571 | 2 | 86 | 1 | 1126 | 25.99047006 |
| <i>CACNG4</i>   | 0.014835425 | 0.537151571 | 2 | 86 | 1 | 1126 | 25.99047006 |
| <i>CEP295NL</i> | 0.014835425 | 0.537151571 | 2 | 86 | 1 | 1126 | 25.99047006 |
| <i>CSN2</i>     | 0.014835425 | 0.537151571 | 2 | 86 | 1 | 1126 | 25.99047006 |
| <i>FRG1</i>     | 0.014835425 | 0.537151571 | 2 | 86 | 1 | 1126 | 25.99047006 |
| <i>FSD1L</i>    | 0.014835425 | 0.537151571 | 2 | 86 | 1 | 1126 | 25.99047006 |
| <i>GALNT3</i>   | 0.014835425 | 0.537151571 | 2 | 86 | 1 | 1126 | 25.99047006 |
| <i>HS3ST3A1</i> | 0.014835425 | 0.537151571 | 2 | 86 | 1 | 1126 | 25.99047006 |
| <i>KCNK18</i>   | 0.014835425 | 0.537151571 | 2 | 86 | 1 | 1126 | 25.99047006 |
| <i>LINS1</i>    | 0.014835425 | 0.537151571 | 2 | 86 | 1 | 1126 | 25.99047006 |
| <i>MPV17L2</i>  | 0.014835425 | 0.537151571 | 2 | 86 | 1 | 1126 | 25.99047006 |
| <i>MRPL12</i>   | 0.014835425 | 0.537151571 | 2 | 86 | 1 | 1126 | 25.99047006 |
| <i>MTFR1</i>    | 0.014835425 | 0.537151571 | 2 | 86 | 1 | 1126 | 25.99047006 |
| <i>MTMR6</i>    | 0.014835425 | 0.537151571 | 2 | 86 | 1 | 1126 | 25.99047006 |
| <i>NGB</i>      | 0.014835425 | 0.537151571 | 2 | 86 | 1 | 1126 | 25.99047006 |
| <i>NOS1AP</i>   | 0.014835425 | 0.537151571 | 2 | 86 | 1 | 1126 | 25.99047006 |
| <i>OR8A1</i>    | 0.014835425 | 0.537151571 | 2 | 86 | 1 | 1126 | 25.99047006 |
| <i>PRR23A</i>   | 0.014835425 | 0.537151571 | 2 | 86 | 1 | 1126 | 25.99047006 |
| <i>RBM45</i>    | 0.014835425 | 0.537151571 | 2 | 86 | 1 | 1126 | 25.99047006 |
| <i>RFESD</i>    | 0.014835425 | 0.537151571 | 2 | 86 | 1 | 1126 | 25.99047006 |
| <i>RNF167</i>   | 0.014835425 | 0.537151571 | 2 | 86 | 1 | 1126 | 25.99047006 |
| <i>SLC2A14</i>  | 0.014835425 | 0.537151571 | 2 | 86 | 1 | 1126 | 25.99047006 |
| <i>TAAR8</i>    | 0.014835425 | 0.537151571 | 2 | 86 | 1 | 1126 | 25.99047006 |
| <i>TM4SF4</i>   | 0.014835425 | 0.537151571 | 2 | 86 | 1 | 1126 | 25.99047006 |
| <i>TOGARAM1</i> | 0.014835425 | 0.537151571 | 2 | 86 | 1 | 1126 | 25.99047006 |

|                 |             |             |   |    |    |      |             |
|-----------------|-------------|-------------|---|----|----|------|-------------|
| <i>WASHC4</i>   | 0.014835425 | 0.537151571 | 2 | 86 | 1  | 1126 | 25.99047006 |
| <i>WASHC5</i>   | 0.014835425 | 0.537151571 | 2 | 86 | 1  | 1126 | 25.99047006 |
| <i>CFAP206</i>  | 0.014874525 | 0.537151571 | 6 | 82 | 23 | 1104 | 3.506219086 |
| <i>CHRNE</i>    | 0.014874525 | 0.537151571 | 6 | 82 | 23 | 1104 | 3.506219086 |
| <i>GCNT2</i>    | 0.014874525 | 0.537151571 | 6 | 82 | 23 | 1104 | 3.506219086 |
| <i>TMEM131L</i> | 0.014874525 | 0.537151571 | 6 | 82 | 23 | 1104 | 3.506219086 |
| <i>CALB2</i>    | 0.01575619  | 0.537151571 | 3 | 85 | 5  | 1122 | 7.890369843 |
| <i>CECR2</i>    | 0.01575619  | 0.537151571 | 3 | 85 | 5  | 1122 | 7.890369843 |
| <i>CELA2A</i>   | 0.01575619  | 0.537151571 | 3 | 85 | 5  | 1122 | 7.890369843 |
| <i>CERS4</i>    | 0.01575619  | 0.537151571 | 3 | 85 | 5  | 1122 | 7.890369843 |
| <i>CRYGD</i>    | 0.01575619  | 0.537151571 | 3 | 85 | 5  | 1122 | 7.890369843 |
| <i>EAF2</i>     | 0.01575619  | 0.537151571 | 3 | 85 | 5  | 1122 | 7.890369843 |
| <i>FAM13C</i>   | 0.01575619  | 0.537151571 | 3 | 85 | 5  | 1122 | 7.890369843 |
| <i>MED1</i>     | 0.01575619  | 0.537151571 | 3 | 85 | 5  | 1122 | 7.890369843 |
| <i>SAFB2</i>    | 0.01575619  | 0.537151571 | 3 | 85 | 5  | 1122 | 7.890369843 |
| <i>SATB1</i>    | 0.01575619  | 0.537151571 | 3 | 85 | 5  | 1122 | 7.890369843 |
| <i>SGMS1</i>    | 0.01575619  | 0.537151571 | 3 | 85 | 5  | 1122 | 7.890369843 |
| <i>ALPK3</i>    | 0.016319678 | 0.546367192 | 7 | 81 | 31 | 1096 | 3.051007275 |
| <i>BCAR1</i>    | 0.016319678 | 0.546367192 | 7 | 81 | 31 | 1096 | 3.051007275 |
| <i>IQCE</i>     | 0.016319678 | 0.546367192 | 7 | 81 | 31 | 1096 | 3.051007275 |
| <i>CEP192</i>   | 0.01749951  | 0.561045149 | 5 | 83 | 17 | 1110 | 3.926137623 |
| <i>OR8K5</i>    | 0.01749951  | 0.561045149 | 5 | 83 | 17 | 1110 | 3.926137623 |
| <i>VPS33B</i>   | 0.01749951  | 0.561045149 | 5 | 83 | 17 | 1110 | 3.926137623 |
| <i>POLM</i>     | 0.017532014 | 0.561045149 | 6 | 82 | 24 | 1103 | 3.357376457 |
| <i>SEC16A</i>   | 0.01874386  | 0.561045149 | 8 | 80 | 40 | 1087 | 2.714149554 |

|                  |             |             |   |    |    |      |             |
|------------------|-------------|-------------|---|----|----|------|-------------|
| <i>HEATR4</i>    | 0.018914937 | 0.561045149 | 4 | 84 | 11 | 1116 | 4.819458124 |
| <i>MPP5</i>      | 0.018914937 | 0.561045149 | 4 | 84 | 11 | 1116 | 4.819458124 |
| <i>PHF8</i>      | 0.018914937 | 0.561045149 | 4 | 84 | 11 | 1116 | 4.819458124 |
| <i>TREML1</i>    | 0.018914937 | 0.561045149 | 4 | 84 | 11 | 1116 | 4.819458124 |
| <i>ZNF598</i>    | 0.018914937 | 0.561045149 | 4 | 84 | 11 | 1116 | 4.819458124 |
| <i>SLC2A11</i>   | 0.020500327 | 0.561045149 | 6 | 82 | 25 | 1102 | 3.220420591 |
| <i>ZSCAN20</i>   | 0.020500327 | 0.561045149 | 6 | 82 | 25 | 1102 | 3.220420591 |
| <i>AMBRA1</i>    | 0.021109608 | 0.561045149 | 5 | 83 | 18 | 1109 | 3.704572357 |
| <i>DROSHA</i>    | 0.021109608 | 0.561045149 | 5 | 83 | 18 | 1109 | 3.704572357 |
| <i>PDZRN3</i>    | 0.021109608 | 0.561045149 | 5 | 83 | 18 | 1109 | 3.704572357 |
| <i>PI3</i>       | 0.021109608 | 0.561045149 | 5 | 83 | 18 | 1109 | 3.704572357 |
| <i>CFI</i>       | 0.022410817 | 0.561045149 | 3 | 85 | 6  | 1121 | 6.572748347 |
| <i>EHD2</i>      | 0.022410817 | 0.561045149 | 3 | 85 | 6  | 1121 | 6.572748347 |
| <i>ERC2</i>      | 0.022410817 | 0.561045149 | 3 | 85 | 6  | 1121 | 6.572748347 |
| <i>GRM3</i>      | 0.022410817 | 0.561045149 | 3 | 85 | 6  | 1121 | 6.572748347 |
| <i>LPXN</i>      | 0.022410817 | 0.561045149 | 3 | 85 | 6  | 1121 | 6.572748347 |
| <i>MAPK7</i>     | 0.022410817 | 0.561045149 | 3 | 85 | 6  | 1121 | 6.572748347 |
| <i>PDGFB</i>     | 0.022410817 | 0.561045149 | 3 | 85 | 6  | 1121 | 6.572748347 |
| <i>RBMXL3</i>    | 0.022410817 | 0.561045149 | 3 | 85 | 6  | 1121 | 6.572748347 |
| <i>REEP4</i>     | 0.022410817 | 0.561045149 | 3 | 85 | 6  | 1121 | 6.572748347 |
| <i>TPSD1</i>     | 0.022410817 | 0.561045149 | 3 | 85 | 6  | 1121 | 6.572748347 |
| <i>OR9G4</i>     | 0.023794361 | 0.561045149 | 6 | 82 | 26 | 1101 | 3.093984156 |
| <i>ARHGAP11A</i> | 0.023850694 | 0.561045149 | 4 | 84 | 12 | 1115 | 4.414869021 |
| <i>DTNA</i>      | 0.023850694 | 0.561045149 | 4 | 84 | 12 | 1115 | 4.414869021 |
| <i>EGFLAM</i>    | 0.023850694 | 0.561045149 | 4 | 84 | 12 | 1115 | 4.414869021 |

|                 |             |             |    |    |    |      |             |
|-----------------|-------------|-------------|----|----|----|------|-------------|
| <i>SLC36A2</i>  | 0.023850694 | 0.561045149 | 4  | 84 | 12 | 1115 | 4.414869021 |
| <i>TPRN</i>     | 0.023850694 | 0.561045149 | 4  | 84 | 12 | 1115 | 4.414869021 |
| <i>CELSR1</i>   | 0.024029871 | 0.561045149 | 12 | 76 | 78 | 1049 | 2.121628147 |
| <i>BHMT</i>     | 0.025175432 | 0.561045149 | 5  | 83 | 19 | 1108 | 3.506989001 |
| <i>PCDHA7</i>   | 0.025175432 | 0.561045149 | 5  | 83 | 19 | 1108 | 3.506989001 |
| <i>COBL</i>     | 0.027427791 | 0.561045149 | 6  | 82 | 27 | 1100 | 2.976900759 |
| <i>CASKIN2</i>  | 0.027504775 | 0.561045149 | 7  | 81 | 35 | 1092 | 2.693004438 |
| <i>AKIP1</i>    | 0.028276287 | 0.561045149 | 2  | 86 | 2  | 1125 | 13.01225761 |
| <i>BCAT1</i>    | 0.028276287 | 0.561045149 | 2  | 86 | 2  | 1125 | 13.01225761 |
| <i>C17orf49</i> | 0.028276287 | 0.561045149 | 2  | 86 | 2  | 1125 | 13.01225761 |
| <i>CCDC134</i>  | 0.028276287 | 0.561045149 | 2  | 86 | 2  | 1125 | 13.01225761 |
| <i>CYTH2</i>    | 0.028276287 | 0.561045149 | 2  | 86 | 2  | 1125 | 13.01225761 |
| <i>DNAJC30</i>  | 0.028276287 | 0.561045149 | 2  | 86 | 2  | 1125 | 13.01225761 |
| <i>DUOXA2</i>   | 0.028276287 | 0.561045149 | 2  | 86 | 2  | 1125 | 13.01225761 |
| <i>EBF4</i>     | 0.028276287 | 0.561045149 | 2  | 86 | 2  | 1125 | 13.01225761 |
| <i>FRS2</i>     | 0.028276287 | 0.561045149 | 2  | 86 | 2  | 1125 | 13.01225761 |
| <i>FZD6</i>     | 0.028276287 | 0.561045149 | 2  | 86 | 2  | 1125 | 13.01225761 |
| <i>GNA15</i>    | 0.028276287 | 0.561045149 | 2  | 86 | 2  | 1125 | 13.01225761 |
| <i>GRPEL2</i>   | 0.028276287 | 0.561045149 | 2  | 86 | 2  | 1125 | 13.01225761 |
| <i>HOXC10</i>   | 0.028276287 | 0.561045149 | 2  | 86 | 2  | 1125 | 13.01225761 |
| <i>IDI1</i>     | 0.028276287 | 0.561045149 | 2  | 86 | 2  | 1125 | 13.01225761 |
| <i>IKZF3</i>    | 0.028276287 | 0.561045149 | 2  | 86 | 2  | 1125 | 13.01225761 |
| <i>KIAA0895</i> | 0.028276287 | 0.561045149 | 2  | 86 | 2  | 1125 | 13.01225761 |
| <i>NAA40</i>    | 0.028276287 | 0.561045149 | 2  | 86 | 2  | 1125 | 13.01225761 |
| <i>NSA2</i>     | 0.028276287 | 0.561045149 | 2  | 86 | 2  | 1125 | 13.01225761 |

|                |             |             |   |    |    |      |             |
|----------------|-------------|-------------|---|----|----|------|-------------|
| <i>OR10Z1</i>  | 0.028276287 | 0.561045149 | 2 | 86 | 2  | 1125 | 13.01225761 |
| <i>OR9A4</i>   | 0.028276287 | 0.561045149 | 2 | 86 | 2  | 1125 | 13.01225761 |
| <i>PCDHGB5</i> | 0.028276287 | 0.561045149 | 2 | 86 | 2  | 1125 | 13.01225761 |
| <i>PENK</i>    | 0.028276287 | 0.561045149 | 2 | 86 | 2  | 1125 | 13.01225761 |
| <i>PLCXD3</i>  | 0.028276287 | 0.561045149 | 2 | 86 | 2  | 1125 | 13.01225761 |
| <i>POLB</i>    | 0.028276287 | 0.561045149 | 2 | 86 | 2  | 1125 | 13.01225761 |
| <i>PPP1R3C</i> | 0.028276287 | 0.561045149 | 2 | 86 | 2  | 1125 | 13.01225761 |
| <i>REL</i>     | 0.028276287 | 0.561045149 | 2 | 86 | 2  | 1125 | 13.01225761 |
| <i>SASH3</i>   | 0.028276287 | 0.561045149 | 2 | 86 | 2  | 1125 | 13.01225761 |
| <i>SDR9C7</i>  | 0.028276287 | 0.561045149 | 2 | 86 | 2  | 1125 | 13.01225761 |
| <i>SLAMF9</i>  | 0.028276287 | 0.561045149 | 2 | 86 | 2  | 1125 | 13.01225761 |
| <i>SLC2A4</i>  | 0.028276287 | 0.561045149 | 2 | 86 | 2  | 1125 | 13.01225761 |
| <i>SNX15</i>   | 0.028276287 | 0.561045149 | 2 | 86 | 2  | 1125 | 13.01225761 |
| <i>TAB2</i>    | 0.028276287 | 0.561045149 | 2 | 86 | 2  | 1125 | 13.01225761 |
| <i>TNPO1</i>   | 0.028276287 | 0.561045149 | 2 | 86 | 2  | 1125 | 13.01225761 |
| <i>TTL8</i>    | 0.028276287 | 0.561045149 | 2 | 86 | 2  | 1125 | 13.01225761 |
| <i>KCTD19</i>  | 0.029408001 | 0.561045149 | 8 | 80 | 44 | 1083 | 2.458789055 |
| <i>STAB2</i>   | 0.029408001 | 0.561045149 | 8 | 80 | 44 | 1083 | 2.458789055 |
| <i>CERK</i>    | 0.029499882 | 0.561045149 | 4 | 84 | 13 | 1114 | 4.072570641 |
| <i>EARS2</i>   | 0.029499882 | 0.561045149 | 4 | 84 | 13 | 1114 | 4.072570641 |
| <i>HACD4</i>   | 0.029499882 | 0.561045149 | 4 | 84 | 13 | 1114 | 4.072570641 |
| <i>PCDHA3</i>  | 0.029499882 | 0.561045149 | 4 | 84 | 13 | 1114 | 4.072570641 |
| <i>PFKFB1</i>  | 0.029499882 | 0.561045149 | 4 | 84 | 13 | 1114 | 4.072570641 |
| <i>EPB41L2</i> | 0.029714407 | 0.561045149 | 5 | 83 | 20 | 1107 | 3.328982604 |
| <i>HHLA2</i>   | 0.029714407 | 0.561045149 | 5 | 83 | 20 | 1107 | 3.328982604 |

|                 |             |             |   |    |    |      |             |
|-----------------|-------------|-------------|---|----|----|------|-------------|
| <i>SGSM1</i>    | 0.029714407 | 0.561045149 | 5 | 83 | 20 | 1107 | 3.328982604 |
| <i>SNX21</i>    | 0.029714407 | 0.561045149 | 5 | 83 | 20 | 1107 | 3.328982604 |
| <i>TRPV4</i>    | 0.029714407 | 0.561045149 | 5 | 83 | 20 | 1107 | 3.328982604 |
| <i>TBC1D9B</i>  | 0.030085959 | 0.561045149 | 9 | 79 | 53 | 1074 | 2.306522146 |
| <i>ARMC3</i>    | 0.030363736 | 0.561045149 | 3 | 85 | 7  | 1120 | 5.63090496  |
| <i>ASL</i>      | 0.030363736 | 0.561045149 | 3 | 85 | 7  | 1120 | 5.63090496  |
| <i>CALCR</i>    | 0.030363736 | 0.561045149 | 3 | 85 | 7  | 1120 | 5.63090496  |
| <i>FAM89A</i>   | 0.030363736 | 0.561045149 | 3 | 85 | 7  | 1120 | 5.63090496  |
| <i>FJX1</i>     | 0.030363736 | 0.561045149 | 3 | 85 | 7  | 1120 | 5.63090496  |
| <i>GRM2</i>     | 0.030363736 | 0.561045149 | 3 | 85 | 7  | 1120 | 5.63090496  |
| <i>OR52D1</i>   | 0.030363736 | 0.561045149 | 3 | 85 | 7  | 1120 | 5.63090496  |
| <i>PPP4R3B</i>  | 0.030363736 | 0.561045149 | 3 | 85 | 7  | 1120 | 5.63090496  |
| <i>PRMT3</i>    | 0.030363736 | 0.561045149 | 3 | 85 | 7  | 1120 | 5.63090496  |
| <i>RASA1</i>    | 0.030363736 | 0.561045149 | 3 | 85 | 7  | 1120 | 5.63090496  |
| <i>SH3PXD2B</i> | 0.030363736 | 0.561045149 | 3 | 85 | 7  | 1120 | 5.63090496  |
| <i>TMTC2</i>    | 0.030363736 | 0.561045149 | 3 | 85 | 7  | 1120 | 5.63090496  |
| <i>TRPC4AP</i>  | 0.030363736 | 0.561045149 | 3 | 85 | 7  | 1120 | 5.63090496  |
| <i>TSTA3</i>    | 0.030363736 | 0.561045149 | 3 | 85 | 7  | 1120 | 5.63090496  |
| <i>TXLNB</i>    | 0.030363736 | 0.561045149 | 3 | 85 | 7  | 1120 | 5.63090496  |
| <i>PLEKHA7</i>  | 0.030961154 | 0.561045149 | 7 | 81 | 36 | 1091 | 2.615960829 |
| <i>ANK2</i>     | 0.031412972 | 0.561045149 | 6 | 82 | 28 | 1099 | 2.86832926  |
| <i>CAPN2</i>    | 0.031412972 | 0.561045149 | 6 | 82 | 28 | 1099 | 2.86832926  |
| <i>TMPRSS9</i>  | 0.032623149 | 0.561045149 | 8 | 80 | 45 | 1082 | 2.402016769 |
| <i>FAM81B</i>   | 0.034741063 | 0.561045149 | 5 | 83 | 21 | 1106 | 3.167901199 |
| <i>REV3L</i>    | 0.034741063 | 0.561045149 | 5 | 83 | 21 | 1106 | 3.167901199 |

|                 |             |             |   |    |    |      |             |
|-----------------|-------------|-------------|---|----|----|------|-------------|
| <i>SDCBP2</i>   | 0.035760843 | 0.561045149 | 6 | 82 | 29 | 1098 | 2.766796582 |
| <i>ADAMTS6</i>  | 0.035878629 | 0.561045149 | 4 | 84 | 14 | 1113 | 3.778352847 |
| <i>APBB2</i>    | 0.035878629 | 0.561045149 | 4 | 84 | 14 | 1113 | 3.778352847 |
| <i>DUXA</i>     | 0.035878629 | 0.561045149 | 4 | 84 | 14 | 1113 | 3.778352847 |
| <i>EAF1</i>     | 0.035878629 | 0.561045149 | 4 | 84 | 14 | 1113 | 3.778352847 |
| <i>FER1L5</i>   | 0.035878629 | 0.561045149 | 4 | 84 | 14 | 1113 | 3.778352847 |
| <i>NRBP1</i>    | 0.035878629 | 0.561045149 | 4 | 84 | 14 | 1113 | 3.778352847 |
| <i>P2RX6</i>    | 0.035878629 | 0.561045149 | 4 | 84 | 14 | 1113 | 3.778352847 |
| <i>PCDHAC1</i>  | 0.035878629 | 0.561045149 | 4 | 84 | 14 | 1113 | 3.778352847 |
| <i>PLEKHH1</i>  | 0.035878629 | 0.561045149 | 4 | 84 | 14 | 1113 | 3.778352847 |
| <i>POLK</i>     | 0.035878629 | 0.561045149 | 4 | 84 | 14 | 1113 | 3.778352847 |
| <i>PROSER2</i>  | 0.035878629 | 0.561045149 | 4 | 84 | 14 | 1113 | 3.778352847 |
| <i>RSPH1</i>    | 0.035878629 | 0.561045149 | 4 | 84 | 14 | 1113 | 3.778352847 |
| <i>SPATA5L1</i> | 0.035878629 | 0.561045149 | 4 | 84 | 14 | 1113 | 3.778352847 |
| <i>COL24A1</i>  | 0.038730587 | 0.561045149 | 7 | 81 | 38 | 1089 | 2.473821421 |
| <i>FBP2</i>     | 0.038730587 | 0.561045149 | 7 | 81 | 38 | 1089 | 2.473821421 |
| <i>CCDC40</i>   | 0.03956572  | 0.561045149 | 9 | 79 | 56 | 1071 | 2.176784585 |
| <i>ADRA1A</i>   | 0.039603641 | 0.561045149 | 3 | 85 | 8  | 1119 | 4.924482542 |
| <i>CASQ2</i>    | 0.039603641 | 0.561045149 | 3 | 85 | 8  | 1119 | 4.924482542 |
| <i>COX18</i>    | 0.039603641 | 0.561045149 | 3 | 85 | 8  | 1119 | 4.924482542 |
| <i>DCDC1</i>    | 0.039603641 | 0.561045149 | 3 | 85 | 8  | 1119 | 4.924482542 |
| <i>FLT1</i>     | 0.039603641 | 0.561045149 | 3 | 85 | 8  | 1119 | 4.924482542 |
| <i>MDGA2</i>    | 0.039603641 | 0.561045149 | 3 | 85 | 8  | 1119 | 4.924482542 |
| <i>MICALL1</i>  | 0.039603641 | 0.561045149 | 3 | 85 | 8  | 1119 | 4.924482542 |
| <i>NPL</i>      | 0.039603641 | 0.561045149 | 3 | 85 | 8  | 1119 | 4.924482542 |



|                 |             |             |   |    |    |      |             |
|-----------------|-------------|-------------|---|----|----|------|-------------|
| <i>PROZ</i>     | 0.039603641 | 0.561045149 | 3 | 85 | 8  | 1119 | 4.924482542 |
| <i>SIAE</i>     | 0.039603641 | 0.561045149 | 3 | 85 | 8  | 1119 | 4.924482542 |
| <i>SMAD9</i>    | 0.039603641 | 0.561045149 | 3 | 85 | 8  | 1119 | 4.924482542 |
| <i>WDR64</i>    | 0.039603641 | 0.561045149 | 3 | 85 | 8  | 1119 | 4.924482542 |
| <i>ZNF805</i>   | 0.039603641 | 0.561045149 | 3 | 85 | 8  | 1119 | 4.924482542 |
| <i>UGT1A4</i>   | 0.040266964 | 0.561045149 | 5 | 83 | 22 | 1105 | 3.021442067 |
| <i>AVIL</i>     | 0.040480862 | 0.561045149 | 6 | 82 | 30 | 1097 | 2.672372655 |
| <i>COL17A1</i>  | 0.040480862 | 0.561045149 | 6 | 82 | 30 | 1097 | 2.672372655 |
| <i>PTPN7</i>    | 0.040480862 | 0.561045149 | 6 | 82 | 30 | 1097 | 2.672372655 |
| <i>CCDC120</i>  | 0.042995966 | 0.561045149 | 4 | 84 | 15 | 1112 | 3.524053365 |
| <i>PCDHA11</i>  | 0.042995966 | 0.561045149 | 4 | 84 | 15 | 1112 | 3.524053365 |
| <i>PIK3R2</i>   | 0.042995966 | 0.561045149 | 4 | 84 | 15 | 1112 | 3.524053365 |
| <i>SGSM2</i>    | 0.042995966 | 0.561045149 | 4 | 84 | 15 | 1112 | 3.524053365 |
| <i>SLC34A1</i>  | 0.042995966 | 0.561045149 | 4 | 84 | 15 | 1112 | 3.524053365 |
| <i>STK3</i>     | 0.042995966 | 0.561045149 | 4 | 84 | 15 | 1112 | 3.524053365 |
| <i>UNC13A</i>   | 0.042995966 | 0.561045149 | 4 | 84 | 15 | 1112 | 3.524053365 |
| <i>ULK4</i>     | 0.043699109 | 0.561045149 | 8 | 80 | 48 | 1079 | 2.245835805 |
| <i>AAGAB</i>    | 0.044924752 | 0.561045149 | 2 | 86 | 3  | 1124 | 8.678378283 |
| <i>ABHD6</i>    | 0.044924752 | 0.561045149 | 2 | 86 | 3  | 1124 | 8.678378283 |
| <i>ACMSD</i>    | 0.044924752 | 0.561045149 | 2 | 86 | 3  | 1124 | 8.678378283 |
| <i>AGTRAP</i>   | 0.044924752 | 0.561045149 | 2 | 86 | 3  | 1124 | 8.678378283 |
| <i>BICDL2</i>   | 0.044924752 | 0.561045149 | 2 | 86 | 3  | 1124 | 8.678378283 |
| <i>C17orf74</i> | 0.044924752 | 0.561045149 | 2 | 86 | 3  | 1124 | 8.678378283 |
| <i>CCT3</i>     | 0.044924752 | 0.561045149 | 2 | 86 | 3  | 1124 | 8.678378283 |
| <i>CGB2</i>     | 0.044924752 | 0.561045149 | 2 | 86 | 3  | 1124 | 8.678378283 |

|                 |             |             |   |    |   |      |             |
|-----------------|-------------|-------------|---|----|---|------|-------------|
| <i>CLRN2</i>    | 0.044924752 | 0.561045149 | 2 | 86 | 3 | 1124 | 8.678378283 |
| <i>CLUL1</i>    | 0.044924752 | 0.561045149 | 2 | 86 | 3 | 1124 | 8.678378283 |
| <i>CXorf36</i>  | 0.044924752 | 0.561045149 | 2 | 86 | 3 | 1124 | 8.678378283 |
| <i>CYP26B1</i>  | 0.044924752 | 0.561045149 | 2 | 86 | 3 | 1124 | 8.678378283 |
| <i>CYP4X1</i>   | 0.044924752 | 0.561045149 | 2 | 86 | 3 | 1124 | 8.678378283 |
| <i>DEFB119</i>  | 0.044924752 | 0.561045149 | 2 | 86 | 3 | 1124 | 8.678378283 |
| <i>DGCR6</i>    | 0.044924752 | 0.561045149 | 2 | 86 | 3 | 1124 | 8.678378283 |
| <i>ENDOG</i>    | 0.044924752 | 0.561045149 | 2 | 86 | 3 | 1124 | 8.678378283 |
| <i>EREG</i>     | 0.044924752 | 0.561045149 | 2 | 86 | 3 | 1124 | 8.678378283 |
| <i>FAM171A2</i> | 0.044924752 | 0.561045149 | 2 | 86 | 3 | 1124 | 8.678378283 |
| <i>FGD3</i>     | 0.044924752 | 0.561045149 | 2 | 86 | 3 | 1124 | 8.678378283 |
| <i>GDF10</i>    | 0.044924752 | 0.561045149 | 2 | 86 | 3 | 1124 | 8.678378283 |
| <i>GPC5</i>     | 0.044924752 | 0.561045149 | 2 | 86 | 3 | 1124 | 8.678378283 |
| <i>GPR37</i>    | 0.044924752 | 0.561045149 | 2 | 86 | 3 | 1124 | 8.678378283 |
| <i>GPR39</i>    | 0.044924752 | 0.561045149 | 2 | 86 | 3 | 1124 | 8.678378283 |
| <i>HNRNPM</i>   | 0.044924752 | 0.561045149 | 2 | 86 | 3 | 1124 | 8.678378283 |
| <i>HUS1</i>     | 0.044924752 | 0.561045149 | 2 | 86 | 3 | 1124 | 8.678378283 |
| <i>LGMN</i>     | 0.044924752 | 0.561045149 | 2 | 86 | 3 | 1124 | 8.678378283 |
| <i>MANSC4</i>   | 0.044924752 | 0.561045149 | 2 | 86 | 3 | 1124 | 8.678378283 |
| <i>MBLAC2</i>   | 0.044924752 | 0.561045149 | 2 | 86 | 3 | 1124 | 8.678378283 |
| <i>MTRF1L</i>   | 0.044924752 | 0.561045149 | 2 | 86 | 3 | 1124 | 8.678378283 |
| <i>MUC22</i>    | 0.044924752 | 0.561045149 | 2 | 86 | 3 | 1124 | 8.678378283 |
| <i>MYRFL</i>    | 0.044924752 | 0.561045149 | 2 | 86 | 3 | 1124 | 8.678378283 |
| <i>NAB2</i>     | 0.044924752 | 0.561045149 | 2 | 86 | 3 | 1124 | 8.678378283 |
| <i>NELFB</i>    | 0.044924752 | 0.561045149 | 2 | 86 | 3 | 1124 | 8.678378283 |

|                  |             |             |   |    |    |      |             |
|------------------|-------------|-------------|---|----|----|------|-------------|
| <i>NPTXR</i>     | 0.044924752 | 0.561045149 | 2 | 86 | 3  | 1124 | 8.678378283 |
| <i>OR10AD1</i>   | 0.044924752 | 0.561045149 | 2 | 86 | 3  | 1124 | 8.678378283 |
| <i>PABPC4</i>    | 0.044924752 | 0.561045149 | 2 | 86 | 3  | 1124 | 8.678378283 |
| <i>PAFAH1B2</i>  | 0.044924752 | 0.561045149 | 2 | 86 | 3  | 1124 | 8.678378283 |
| <i>PSAT1</i>     | 0.044924752 | 0.561045149 | 2 | 86 | 3  | 1124 | 8.678378283 |
| <i>PTPRE</i>     | 0.044924752 | 0.561045149 | 2 | 86 | 3  | 1124 | 8.678378283 |
| <i>RFC4</i>      | 0.044924752 | 0.561045149 | 2 | 86 | 3  | 1124 | 8.678378283 |
| <i>RND1</i>      | 0.044924752 | 0.561045149 | 2 | 86 | 3  | 1124 | 8.678378283 |
| <i>RRAGD</i>     | 0.044924752 | 0.561045149 | 2 | 86 | 3  | 1124 | 8.678378283 |
| <i>SAV1</i>      | 0.044924752 | 0.561045149 | 2 | 86 | 3  | 1124 | 8.678378283 |
| <i>SLC25A13</i>  | 0.044924752 | 0.561045149 | 2 | 86 | 3  | 1124 | 8.678378283 |
| <i>SUPT20HL1</i> | 0.044924752 | 0.561045149 | 2 | 86 | 3  | 1124 | 8.678378283 |
| <i>SUPT7L</i>    | 0.044924752 | 0.561045149 | 2 | 86 | 3  | 1124 | 8.678378283 |
| <i>TXLNA</i>     | 0.044924752 | 0.561045149 | 2 | 86 | 3  | 1124 | 8.678378283 |
| <i>UHRF1BP1</i>  | 0.044924752 | 0.561045149 | 2 | 86 | 3  | 1124 | 8.678378283 |
| <i>VPS39</i>     | 0.044924752 | 0.561045149 | 2 | 86 | 3  | 1124 | 8.678378283 |
| <i>ZDHHC24</i>   | 0.044924752 | 0.561045149 | 2 | 86 | 3  | 1124 | 8.678378283 |
| <i>ZNF101</i>    | 0.044924752 | 0.561045149 | 2 | 86 | 3  | 1124 | 8.678378283 |
| <i>FAM149A</i>   | 0.045580947 | 0.561045149 | 6 | 82 | 31 | 1096 | 2.583983491 |
| <i>CDK13</i>     | 0.04630068  | 0.561045149 | 5 | 83 | 23 | 1104 | 2.887797704 |
| <i>MAPK12</i>    | 0.04630068  | 0.561045149 | 5 | 83 | 23 | 1104 | 2.887797704 |
| <i>MCM5</i>      | 0.04630068  | 0.561045149 | 5 | 83 | 23 | 1104 | 2.887797704 |
| <i>MINDY4</i>    | 0.04630068  | 0.561045149 | 5 | 83 | 23 | 1104 | 2.887797704 |
| <i>PLEKHG3</i>   | 0.04630068  | 0.561045149 | 5 | 83 | 23 | 1104 | 2.887797704 |
| <i>EFCAB7</i>    | 0.047691468 | 0.561045149 | 7 | 81 | 40 | 1087 | 2.346159448 |

|                |             |             |    |    |     |      |             |
|----------------|-------------|-------------|----|----|-----|------|-------------|
| <i>ATP7B</i>   | 0.047887495 | 0.561045149 | 8  | 80 | 49  | 1078 | 2.198068543 |
| <i>MAPKBP1</i> | 0.047887495 | 0.561045149 | 8  | 80 | 49  | 1078 | 2.198068543 |
| <i>DNAH7</i>   | 0.049426545 | 0.561045149 | 16 | 72 | 129 | 998  | 1.718295763 |

FDR, false discovery rate; Inf, infinity

**Supplementary Table X. Novel variants predicted to cause LoF in genes intolerant to LoF.**

| Sample                  | Sex | Gene    | Variant (hg19)       | Affected transcripts and exons                                                                                                                                                                                                                                       | Coronary artery pext |
|-------------------------|-----|---------|----------------------|----------------------------------------------------------------------------------------------------------------------------------------------------------------------------------------------------------------------------------------------------------------------|----------------------|
| 052                     | F   | ACACA   | chr17-35536331-C-T   | ENST00000335166 exon 40/55; ENST00000353139* exon 41/56; ENST00000360679 exon 39/54; ENST00000394406 exon 41/56; ENST00000592427 exon 3/4; NM_198834.3* exon 41/56; NM_198836.2 exon 41/56; NM_198837.1 exon 39/54; NM_198838.1 exon 40/55; NM_198839.2 exon 45/60   | 0.188963211          |
| BPt0061<br>8529<br>(UK) | M   | ACACA   | chr17-35482716-C-A^  | ENST00000612895 exon 45/53                                                                                                                                                                                                                                           | 0.73494983           |
| 115                     | F   | AHR     | chr7-17379316-C-T    | ENST00000242057* exon 10/11; NM_001621.5* exon 10/11                                                                                                                                                                                                                 | 0.954151177          |
| 170                     | F   | CD68    | chr17-7483368-GCACT- | ENST00000250092* exon 2/6; ENST00000380498 exon 2/6; ENST00000584502 exon 2/3; NM_001040059.2 exon 2/6; NM_001251.3* exon 2/6                                                                                                                                        | 0.985203797          |
| 063                     | F   | DNAJC13 | chr3-132242434-T-    | ENST00000260818* exon 51/56; NM_001329126.2 exon 52/57; NM_015268.4* exon 51/56                                                                                                                                                                                      | 0.845611787          |
| 123                     | F   | INTS8   | chr8-95850807-T-G    | ENST00000447247 exon 8/26; ENST00000520526 exon 4/22; ENST00000523731* exon 8/27; NM_017864.4* exon 8/27                                                                                                                                                             | 0.311714429          |
| 131                     | M   | MEX3A   | chr1-156051687-C-A   | ENST00000532414* exon 1/2; NM_001093725.2* exon 1/2                                                                                                                                                                                                                  | 1                    |
| 109                     | F   | NASP    | chr1-46080014--CT    | ENST00000350030* exon 9/15; ENST00000351223 exon 8/14; ENST00000372052 exon 7/13; ENST00000402363 exon 10/16; ENST00000528238 exon 6/8; ENST00000531612 exon 3/9; ENST00000537798 exon 7/13; NM_001195193.1 exon 7/13; NM_002482.4* exon 9/15; NM_152298.4 exon 8/14 | 0.660536267          |
| 037                     | F   | NCBP3   | chr17-3716462-G-     | ENST00000576523 exon 1/2                                                                                                                                                                                                                                             | 0.678737713          |
| 020                     | F   | NEDD4L  | chr18-55816792-G-    | NM_001144968.2 exon 1/31; NM_001144969.2 exon 1/30                                                                                                                                                                                                                   | 0.04494382           |
| 115                     | F   | NTNG2   | chr9-135042407-C-    | ENST00000360670 exon 2/8; ENST00000372179 exon 2/6; ENST00000393228 exon 2/7; ENST00000393229* exon 2/8; NM_032536.4* exon 2/8                                                                                                                                       | 0.829268293          |
| 159                     | F   | NUP85   | chr17-73221237-C-T   | ENST00000245544* exon 8/19; ENST00000447371 exon 7/17; ENST00000541827 exon 7/18; ENST00000579324 exon 7/18; ENST00000579557 exon 1/7; ENST00000583877 exon 2/5; NM_001303276.1 exon 7/18; NM_024844.5* exon 8/19                                                    | 0.39498731           |

|     |   |                |                    |                                                                                                                                                                                                                                                                                                                                                                            |                          |
|-----|---|----------------|--------------------|----------------------------------------------------------------------------------------------------------------------------------------------------------------------------------------------------------------------------------------------------------------------------------------------------------------------------------------------------------------------------|--------------------------|
| 095 | F | <i>OTUD4</i>   | chr4-146071803-G-  | ENST00000447906 exon 13/21; ENST00000454497* exon 13/21; ENST00000514973 exon 13/14; NM_001102653.1* exon 13/21; NM_001366057.1 exon 13/21                                                                                                                                                                                                                                 | 0.893514812              |
| 156 | F | <i>RBM26</i>   | chr13-79939762--C  | ENST00000267229* exon 9/21; ENST00000438724 exon 9/21; ENST00000438737 exon 9/22; NM_001286631.1 exon 9/22; NM_001286632.1 exon 9/21; NM_001366735.2 exon 9/22; NM_022118.5* exon 9/21                                                                                                                                                                                     | 0.538535645              |
| 010 | F | <i>RIMS1</i>   | chr6-72935416-C-G  | NM_001350421.2 exon 2/25; NM_001350424.2 exon 2/22; NM_001350428.2 exon 2/23; NM_001350430.2 exon 2/23; NM_001350437.2 exon 2/26; NM_001350450.2 exon 2/22; NM_001350459.2 exon 2/25; NM_001350462.2 exon 2/26; NM_001350471.2 exon 2/25                                                                                                                                   | not estimated for exon 2 |
| 049 | F | <i>SAMHD1</i>  | chr20-35579902-G-A | ENST00000262878* exon 1/16; NM_001363729.2 exon 1/15; NM_001363733.2 exon 1/16; NM_015474.3 exon 1/16                                                                                                                                                                                                                                                                      | 0.965120927              |
| 162 | M | <i>SIPA1L3</i> | chr19-38579369--A  | ENST00000222345* exon 4/22; NM_015073.3* exon 4/22                                                                                                                                                                                                                                                                                                                         | 0.925581395              |
| 136 | F | <i>SKIL</i>    | chr3-170078966-C-T | ENST00000259119 exon 2/7; ENST00000413427 exon 1/6; ENST00000426052 exon 3/8; ENST00000458537* exon 1/6; NM_001145097.2 exon 1/6; NM_001145098.3 exon 3/8; NM_001248008.1* exon 1/6; NM_005414.5 exon 2/7                                                                                                                                                                  | 0.906399236              |
| 129 | F | <i>SYNRG</i>   | chr17-35944807-A-  | ENST00000339208* exon 6/22; ENST00000345615 exon 6/20; ENST00000346661 exon 6/21; ENST00000394378 exon 6/22; ENST00000502449 exon 6/20; ENST00000585472 exon 6/21; ENST00000591288 exon 6/20; NM_001163544.3* exon 6/21; NM_001163545.3 exon 6/21; NM_001163546.3 exon 6/20; NM_001163547.3 exon 6/20; NM_007247.6 exon 6/22; NM_080550.5 exon 6/20; NM_198882.3 exon 6/22 | 0.778220452              |
| 007 | F | <i>TAF9B</i>   | chrX-77395065-TC-  | ENST00000341864* exon 1/7; NM_015975.5* exon 1/7                                                                                                                                                                                                                                                                                                                           | 0.985272459              |
| 109 | F | <i>TERT</i>    | chr5-1268649-C-    | ENST00000310581* exon 9/16; ENST00000334602 exon 9/15; NM_001193376.2 exon 9/15; NM_198253.3* exon 9/16                                                                                                                                                                                                                                                                    | NaN                      |
| 014 | F | <i>TOMM40L</i> | chr1-161197501-C-  | ENST00000367987 exon 4/9; ENST00000367988* exon 5/10; NM_032174.6* exon 5/10                                                                                                                                                                                                                                                                                               | 0.795                    |
| 001 | F | <i>USP25</i>   | chr21-17163902--T  | ENST00000285679* exon 5/24; ENST00000285681 exon 5/25; ENST00000351097 exon 5/11; ENST00000400183 exon 5/26; NM_001283041.2 exon 5/26; NM_001283042.3 exon 5/25; NM_013396.6* exon 5/24                                                                                                                                                                                    | 0.959153902              |
| 164 | F | <i>WWP1</i>    | chr8-87460452--A   | ENST00000265428 exon 17/23; ENST00000341922 exon 14/20; ENST00000349423 exon 12/18; ENST00000517970* exon 19/25; ENST00000520453 exon 6/7; NM_007013.4* exon 19/25                                                                                                                                                                                                         | 0.890309556              |
| 172 | F | <i>ZFP69B</i>  | chr1-40916728-G-A  | NM_001369565.1 exon 2/6; NM_023070.3* exon 1/5                                                                                                                                                                                                                                                                                                                             | 0.604651163              |

pept, proportion expression across transcripts (a measure of the proportion of the total transcriptional output from a gene that would be affected by the variant annotation in question)<sup>76</sup>; \* indicates canonical transcript. ^ University of Leicester SCAD cohort patient, variant position is the hg19 liftover.

**Supplementary Table XI. SVs in LoF-intolerant Genes**

| Sample | Called by       | Chr | Start     | End       | SV type  | SV length | LoF-intolerant gene impacted | Exons and transcripts affected                                                                                                            | GnomAD SV type (AF)                                                  | Other genes impacted                     |
|--------|-----------------|-----|-----------|-----------|----------|-----------|------------------------------|-------------------------------------------------------------------------------------------------------------------------------------------|----------------------------------------------------------------------|------------------------------------------|
| 122    | manta, GRIDSS   | 2   | 115464406 | 115464905 | Del      | 499       | <i>DPP10</i>                 | NM_001321810.2 exon 2;<br>NM_001321905.2 exon 2                                                                                           | Similar del (1.98e-3)                                                | -                                        |
| 051    | manta, CNVnator | 5   | 58706291  | 58737141  | Del      | 30850     | <i>PDE4D</i>                 | NM_001349242.1 exons 2-3                                                                                                                  | Larger del (4.6e-5)                                                  | -                                        |
| 108    | manta, CNVnator | 9   | 14472708  | 14539585  | Del      | 66877     | <i>NFIB</i>                  | NM_001369458.1 exon 1;<br>NM_001369459.1 exon 1;<br>NM_001369462.1 exon 1;<br>NM_001369468.1 exon 1                                       | -                                                                    | -                                        |
| 156    | manta, CNVnator | 9   | 95474546  | 95605123  | Del      | 130577    | <i>BICD2</i>                 | All transcripts (NM_001003800.2*, ENST00000356884.6*, NM_015250.4, ENST00000375512.3) all exons                                           | -                                                                    | <i>LOC101929748</i> ,<br><i>ANKRD19P</i> |
| 130    | manta, GRIDSS   | 10  | 35170017  | 35318413  | Tand dup | 148396    | <i>CUL2</i>                  | NM_001198777.2,<br>NM_001198778.2,<br>NM_001198779.1*,<br>NM_003591.4,<br>ENST00000537177.1*,<br>ENST00000374749.3,<br>ENST00000374751.3, | Two dups impacting the same (and other) exons (combined AF: 1.84e-4) | -                                        |

|     |                    |    |           |           |             |        |               |                                                                                                                                                                                                                          |   |                                                                 |
|-----|--------------------|----|-----------|-----------|-------------|--------|---------------|--------------------------------------------------------------------------------------------------------------------------------------------------------------------------------------------------------------------------|---|-----------------------------------------------------------------|
|     |                    |    |           |           |             |        |               | ENST00000602371.1<br>exons 16 onwards;<br>NM_001324375.2<br>exons 14 onwards;<br>NM_001324376.2,<br>ENST00000374748.1<br>exons 17 onwards;<br>ENST00000374746.1<br>exons 15-19;<br>ENST00000374742.1<br>exons 16 onwards |   |                                                                 |
| 049 | manta,<br>CNVnator | 21 | 33105833  | 33530612  | Tand<br>dup | 424779 | <i>HUNK</i>   | All transcripts<br>(NM_014586.2*,<br>ENST00000270112.2*,<br>ENST00000430354.1,<br>ENST00000465574.1,<br>ENST00000439107.1)<br>all exons                                                                                  | - | <i>LINC00159</i>                                                |
| 098 | manta,<br>CNVnator | X  | 152750583 | 153011928 | Tand<br>dup | 261345 | <i>HAUS7</i>  | NM_001385483.1,<br>ENST00000370210.1,<br>ENST00000421080.2 exon<br>1                                                                                                                                                     | - | <i>BGN, CCNQ,<br/>LOC105373383,<br/>DUSP9, PNCK,<br/>BCAP31</i> |
|     | manta,<br>CNVnator | X  | 152750583 | 153011928 | Tand<br>dup | 261345 | <i>ATP2B3</i> | All transcripts<br>(NM_001001344.2*,<br>ENST00000263519.4*,<br>NM_021949.3,<br>ENST00000349366.2,<br>ENST000000359149.3,<br>ENST00000370181.2,<br>ENST00000370186.1,<br>ENST00000393842.1,<br>ENST00000460549.1,         | - | <i>BGN, CCNQ,<br/>LOC105373383,<br/>DUSP9, PNCK,<br/>BCAP31</i> |



|  |                 |   |           |           |          |        |               |                                                                                                                                                                                             |                                      |                                                     |
|--|-----------------|---|-----------|-----------|----------|--------|---------------|---------------------------------------------------------------------------------------------------------------------------------------------------------------------------------------------|--------------------------------------|-----------------------------------------------------|
|  |                 |   |           |           |          |        |               | ENST00000496610.1) all exons                                                                                                                                                                |                                      |                                                     |
|  | manta, CNVnator | X | 152750583 | 153011928 | Tand dup | 261345 | <i>SLC6A8</i> | All transcripts (NM_005629.4*, ENST00000253122.5*, NM_001142805.2, NM_001142806.1, ENST00000413787.1, ENST00000429147.1, ENST00000430077.2, ENST00000442457.1, ENST00000457723.1) all exons | -                                    | <i>BGN, CCNQ, LOC105373383, DUSP9, PNCK, BCAP31</i> |
|  | manta, CNVnator | X | 152750583 | 153011928 | Tand dup | 261345 | <i>ABCD1</i>  | All transcripts (NM_000033.4*, ENST00000218104.3*, ENST00000370129.4, ENST00000443684.1) all exons                                                                                          | dup of all of <i>ABCD1</i> (7.58e-3) | <i>BGN, CCNQ, LOC105373383, DUSP9, PNCK, BCAP31</i> |

\* Canonical transcript

**Supplementary Table XII: SNPs comprising SCAD PGS calculations.**

| SNP        | Annotated gene(s)                      | Effect allele | Turley <i>et al</i> 2020 weight* | Saw <i>et al</i> 2020 weight^ |
|------------|----------------------------------------|---------------|----------------------------------|-------------------------------|
| rs4970935  | <i>ECM1, C1orf54, ADAMTSL4, MRPS21</i> | C             | 1.77                             | NA                            |
| rs9349379  | <i>PHACTR1</i>                         | A             | 1.71                             | 0.4                           |
| rs11172113 | <i>LRP1</i>                            | T             | 1.69                             | 0.41                          |
| rs28451064 | <i>LINC00310</i>                       | G             | 2.18                             | 0.6                           |

|            |                |   |      |      |
|------------|----------------|---|------|------|
| rs2015637  | <i>FBN1</i>    | C | 1.79 | NA   |
| rs12740679 | <i>C1orf51</i> | G | NA   | 0.59 |
| rs78349783 | <i>NOX3</i>    | G | NA   | 0.56 |
| rs78377252 | <i>NBEAL1</i>  | A | NA   | 1.18 |
| rs11207415 | <i>HSD52</i>   | T | NA   | 0.38 |

\*Reported odds ratio; ^Reported beta

**Supplementary Table XIII:** *COL4A4* variants identified in 91 SCAD cases.

| Sample | Sex | Nucleotide variant                                    | Amino acid variant | Evidence                      | GnomAD MAF  | Phenotype                |
|--------|-----|-------------------------------------------------------|--------------------|-------------------------------|-------------|--------------------------|
| 126    | F   | NM_000092.5:c.2628_2654dupACGGCCTGGGGCACATGGTCCCCCAGG | p.Arg877_Gly885dup | LP (PM1-2, PM4, PP3)          | 0.000004011 | Alport Syndrome and SCAD |
| 010    | F   | NM_000092.5:c.443C>G                                  | p.Pro148Arg        | LP (PM1-2, PP2-3)             | -           | SCAD                     |
| 092    | F   | NM_000092.5:c.1202C>T                                 | p.Ala401Val        | Donor loss<br>SpliceAI = 0.31 | 0.002347    | SCAD                     |

Allele frequencies refer to all gnomAD populations, and both exome and genome data.

**Supplementary Table XIV:** Collapsing analysis in cases and controls for the previously reported genes, *TSR1*, *TLN1*, and *F11R*.

| Gene        | Case carriers % (n = 88) | Control carriers % (n = 1127) | P-value |
|-------------|--------------------------|-------------------------------|---------|
| <i>TSR1</i> | 2.3%                     | 3.1%                          | 0.76    |
| <i>TLN1</i> | 3.4%                     | 0.9%                          | 0.06    |
| <i>F11R</i> | 0%                       | 0.5%                          | 1       |

Case and control carrier proportions were assessed with a one-sided Fisher's Exact test, and p-values are uncorrected.

**Supplementary Table XV:** Definitions of ACMG criteria contributing to likely pathogenic or pathogenic classification for candidate gene variants, taken from Richards et al. 2015<sup>16</sup>.

| Criterion | Definition                                                                                                                                                                   |
|-----------|------------------------------------------------------------------------------------------------------------------------------------------------------------------------------|
| PVS1      | Null variant (nonsense, frameshift, canonical $\pm 1$ or 2 splice sites, initiation codon, single or multiexon deletion) in a gene where LOF is a known mechanism of disease |
| PM1       | Located in a mutational hot spot and/or critical and well-established functional domain (e.g., active site of an enzyme) without benign variation                            |
| PM2       | Absent from controls (or at extremely low frequency if recessive)                                                                                                            |
| PP2       | Missense variant in a gene that has a low rate of benign missense variation and in which missense variants are a common mechanism of disease                                 |
| PP3       | Multiple lines of computational evidence support a deleterious effect on the gene or gene product (conservation, evolutionary, splicing impact, etc.)                        |

### **Supplemental Figures and Figure Legends**

**Supplementary Figure 1.** *Polygenic risk score percentile amongst SCAD and DCM patients relative to MGRB control samples.* Control scores were used to create a reference distribution of scores, created from the 5 SNPs identified in a SCAD GWAS by Turley et al 2020.<sup>74</sup> Violin plots indicate the percentile score distribution relative to the control distribution, while boxplots indicate the score quartiles. The median score for the SCAD group fell into the 73<sup>rd</sup> percentile of the control population (p-value = 2.052e-10), while the DCM median score was in the 55<sup>th</sup> control percentile (p-value = 1.067e-06). No difference was found between control and DCM scores (p-value = 0.9703).

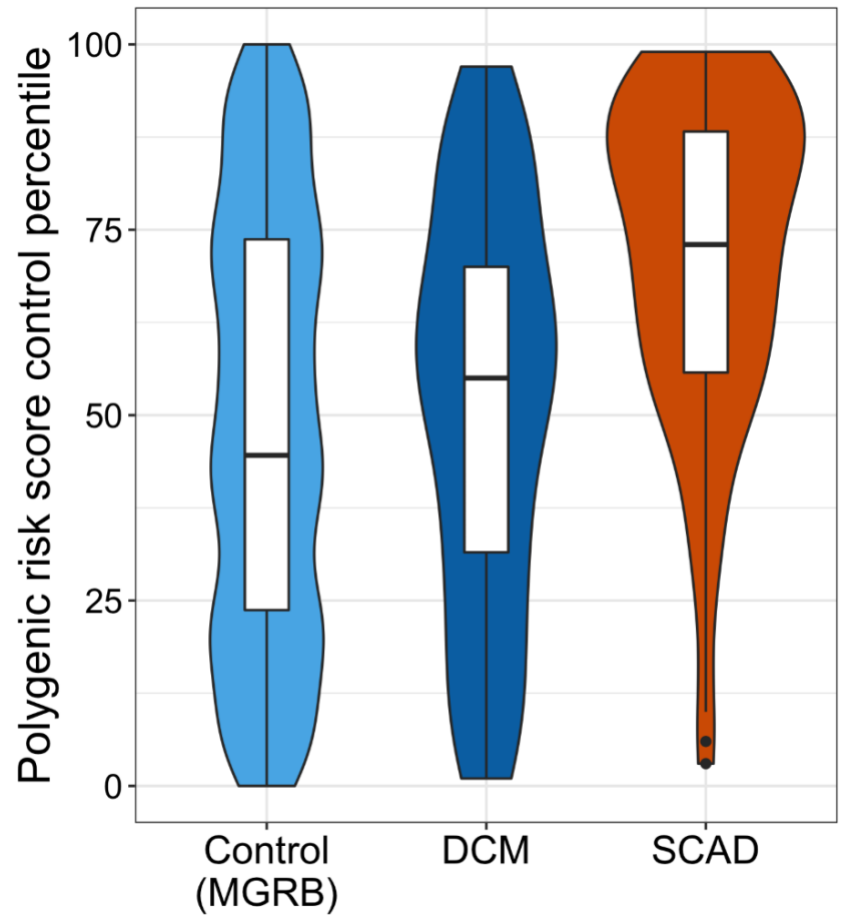

Supplement: NIHMS1805434-supplement-003527_-_Supplemental_Material.pdf [file NIHMS1805434-supplement-003527_-_Supplemental_Material.pdf]
